# Supplementary material for: Adsorption of the Ir4 cluster on single-wall carbon nanotubes: the zigzag types are more suitable
Source: Royal Society of Chemistry journal article supplement (doi:10.1039/c5ra09523a), 2015-01-01
Supplement: c5ra09523a1.pdf [file c5ra09523a1.pdf]

## Supporting Information

### Adsorption of Ir<sub>4</sub> cluster on single-well carbon nanotubes: the zigzag types are more suitable

Jiguang Du<sup>\*1</sup>, Xiyuan Sun<sup>2</sup>, Gang Jiang<sup>3,4</sup>

<sup>1</sup>College of Physical Science and Technology, Sichuan University, Chengdu 610065, China

<sup>2</sup>College of Life and Basic Sciences, Sichuan Agricultural University, Ya'an 625014, China

<sup>3</sup>Institute of Atomic and Molecular Physics, Sichuan University, Chengdu 610065, China

<sup>4</sup>The Key Laboratory of High Energy Density Physics and Technology, Ministry of Education, Chengdu 610065, China

Table S1. The formation energies (eV) for different adsorption modes of SWNT-Ir<sub>4</sub> systems.

| modes | substrates |        |         |        |        |          |
|-------|------------|--------|---------|--------|--------|----------|
|       | (7, 0)     | (8, 0) | (10, 0) | (7, 7) | (8, 8) | (10, 10) |
| T-1   | 4.80       | 4.16   | 5.07    | 3.58   | 3.80   | 4.31     |
| T-2   | 5.31       | 4.06   | 5.33    | 3.73   | 4.09   | 4.53     |
| T-3   | 5.85       | 4.94   | 5.65    | 3.99   | 4.13   | 4.57     |
| S-1   | 4.28       | 3.56   | 4.07    | 3.15   | 2.99   | 3.84     |
| S-2   | 4.66       | 4.03   | 4.66    | 3.26   | 3.22   | 4.11     |
| S-4   | 4.82       | 4.25   | 4.63    | 3.21   | 3.28   | 3.54     |

Table S2. The adsorption energies (eV) of CO and NO molecules on different SWNT-Ir<sub>4</sub> (T-3) systems.

| Molecules | free | substrates |        |         |        |        |          |
|-----------|------|------------|--------|---------|--------|--------|----------|
|           |      | (7, 0)     | (8, 0) | (10, 0) | (7, 7) | (8, 8) | (10, 10) |
| CO        | 2.83 | 2.52       | 2.31   | 2.34    | 2.91   | 2.67   | 2.37     |
| NO        | 3.15 | 3.11       | 2.82   | 3.07    | 3.47   | 3.53   | 3.19     |

\* Corresponding author:  
E-mail: dujg@scu.edu.cn

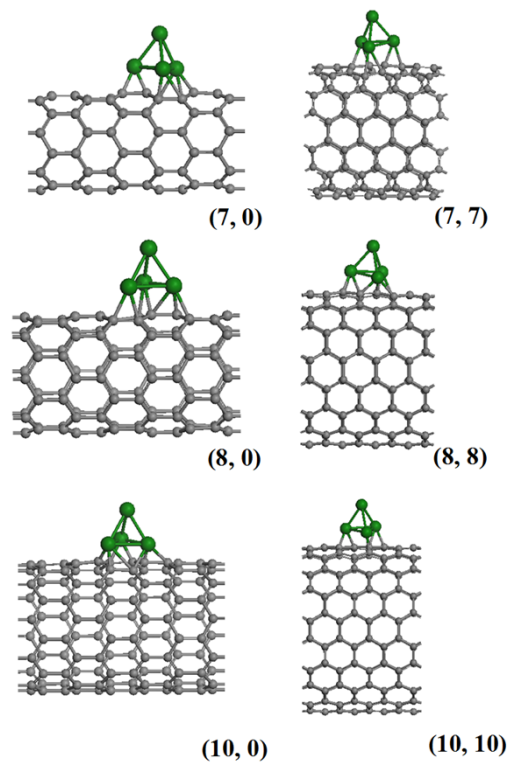

Fig.S1. The relaxed configurations of different SWNTs supported tetrahedron isomer of  $\text{Ir}_4$  cluster in the most stable T-3 model.

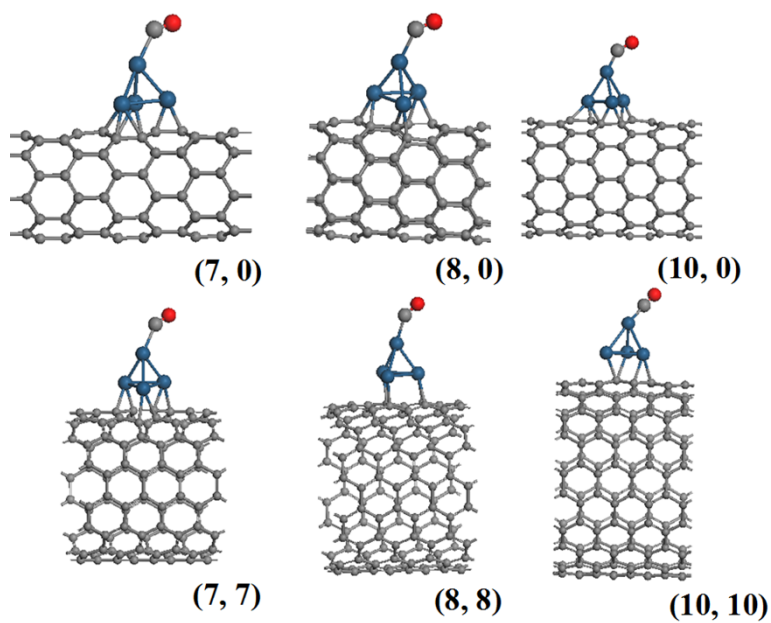

Fig.S2. The relaxed configurations of CO adsorbed on different SWNTs supported tetrahedron isomer of  $\text{Ir}_4$  cluster in T-3 model.

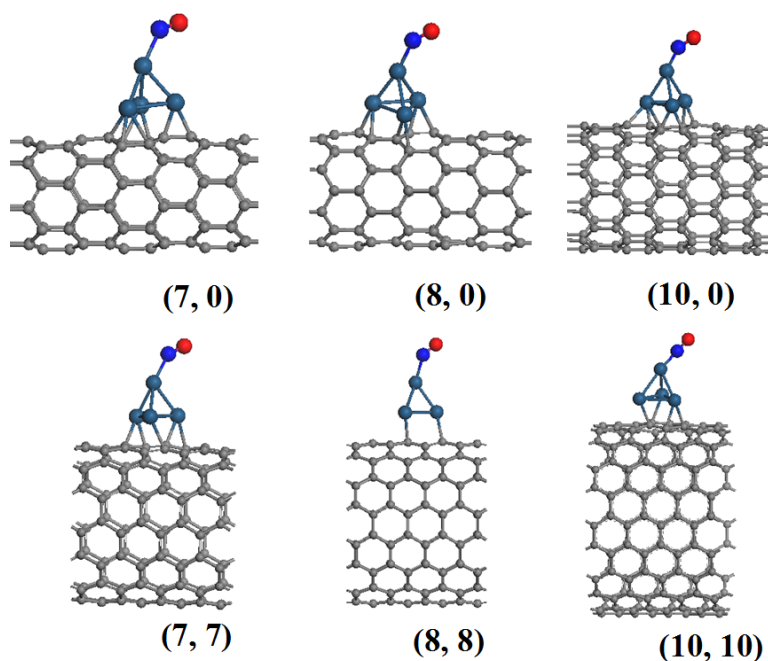

Fig.S3. The relaxed configurations of NO adsorbed on different SWNTs supported tetrahedron isomer of Ir<sub>4</sub> cluster in T-3 model.

The cartesian coordinations of relaxed structures in Fig S1, Fig S2 and Fig S3 are listed as followings:

(7, 0)-Ir<sub>4</sub>

|     |             |              |             |
|-----|-------------|--------------|-------------|
| C1  | 9.099885051 | 14.544350211 | 0.242124117 |
| C2  | 9.095253233 | 14.546207428 | 1.659020025 |
| C3  | 8.054084433 | 15.237401188 | 2.369183413 |
| C4  | 6.823799262 | 15.392726031 | 0.238827845 |
| C5  | 6.822974769 | 15.394041182 | 1.652392858 |
| C6  | 5.645148776 | 14.991073965 | 2.365427112 |
| C7  | 8.049707677 | 15.255159505 | 3.786460092 |
| C8  | 4.766215370 | 14.105259707 | 0.238656654 |
| C9  | 4.769089443 | 14.102786699 | 1.657815308 |
| C10 | 4.361768932 | 12.926439541 | 2.367219525 |
| C11 | 5.643242130 | 15.008300792 | 3.782572276 |
| C12 | 4.484612123 | 11.691644489 | 0.236767359 |
| C13 | 4.486817719 | 11.689130298 | 1.655396050 |
| C14 | 5.139805089 | 10.625009033 | 2.367497104 |
| C15 | 4.372967149 | 12.928110154 | 3.786503238 |
| C16 | 6.180533417 | 9.948508631  | 0.236697463 |
| C17 | 6.180051497 | 9.943624364  | 1.653717942 |
| C18 | 7.414105832 | 9.778168643  | 2.366646187 |
| C19 | 5.144654648 | 10.622287777 | 3.785698739 |
| C20 | 8.595023587 | 10.184455098 | 0.238376174 |
| C21 | 8.592793534 | 10.184104443 | 1.656427247 |

|     |             |              |              |
|-----|-------------|--------------|--------------|
| C22 | 9.470428386 | 11.065803719 | 2.368928857  |
| C23 | 7.415719272 | 9.769577230  | 3.783608231  |
| C24 | 9.882655688 | 12.243485457 | 0.241503908  |
| C25 | 9.879920410 | 12.244295804 | 1.660494734  |
| C26 | 9.739313120 | 13.480254574 | 2.371653305  |
| C27 | 9.466482699 | 11.063627894 | 3.786841887  |
| C28 | 9.732388805 | 13.482692931 | 3.789669542  |
| C29 | 9.098624760 | 14.560108136 | 4.499296395  |
| C30 | 9.096174242 | 14.545436144 | 5.907071984  |
| C31 | 8.074654594 | 15.272037905 | 6.617603071  |
| C32 | 6.814892855 | 15.440704592 | 4.486031382  |
| C33 | 6.792315110 | 15.535564397 | 5.925127695  |
| C34 | 5.602193186 | 15.019275832 | 6.617263264  |
| C35 | 8.074963679 | 15.266892699 | 8.055474004  |
| C36 | 4.766915388 | 14.109472456 | 4.490172554  |
| C37 | 4.769160385 | 14.099262609 | 5.906087514  |
| C38 | 4.395293789 | 12.924930746 | 6.624786973  |
| C39 | 5.586957582 | 15.064936261 | 8.029565398  |
| C40 | 4.504852405 | 11.688336633 | 4.500487775  |
| C41 | 4.513427847 | 11.684886851 | 5.916563069  |
| C42 | 5.151601091 | 10.614981461 | 6.630806810  |
| C43 | 4.422647803 | 12.941399327 | 8.043057738  |
| C44 | 6.182417484 | 9.929882114  | 4.498206488  |
| C45 | 6.184932969 | 9.923726196  | 5.916050025  |
| C46 | 7.420117810 | 9.753885745  | 6.628737814  |
| C47 | 5.162533227 | 10.623325763 | 8.048923474  |
| C48 | 8.593947701 | 10.172332141 | 4.495751776  |
| C49 | 8.597020039 | 10.162329408 | 5.916103512  |
| C50 | 9.469680597 | 11.048772308 | 6.627363559  |
| C51 | 7.422863514 | 9.749129105  | 8.047257260  |
| C52 | 9.860004273 | 12.243768275 | 4.500645990  |
| C53 | 9.856979004 | 12.234552728 | 5.918479891  |
| C54 | 9.697920001 | 13.463671129 | 6.629429269  |
| C55 | 9.470497077 | 11.048365401 | 8.046845755  |
| C56 | 9.708410828 | 13.465174721 | 8.049278991  |
| C57 | 9.103638866 | 14.544515555 | 8.773342099  |
| C58 | 9.081318755 | 14.531765169 | 10.182949651 |
| C59 | 8.040030647 | 15.224421079 | 10.904898472 |
| C60 | 6.796532818 | 15.524758332 | 8.751902037  |
| C61 | 6.809993939 | 15.515484436 | 10.205775865 |
| C62 | 5.611078961 | 15.083533698 | 10.897080831 |
| C63 | 8.052635412 | 15.230727091 | 12.314461410 |
| C64 | 4.741788368 | 14.149764318 | 8.749160410  |
| C65 | 4.797159454 | 14.131812024 | 10.172815736 |

|      |             |              |              |
|------|-------------|--------------|--------------|
| C66  | 4.412177433 | 12.950315806 | 10.882860157 |
| C67  | 5.624428535 | 15.038641844 | 12.319754568 |
| C68  | 4.550872991 | 11.707796053 | 8.760842445  |
| C69  | 4.535751661 | 11.709865122 | 10.172951989 |
| C70  | 5.160868816 | 10.635403294 | 10.888380014 |
| C71  | 4.390966041 | 12.947272719 | 12.301847054 |
| C72  | 6.189266471 | 9.918486309  | 8.760537382  |
| C73  | 6.190828934 | 9.930984233  | 10.178270160 |
| C74  | 7.424128451 | 9.765349495  | 10.892201205 |
| C75  | 5.156524729 | 10.640012327 | 12.305102542 |
| C76  | 8.600288081 | 10.160631730 | 8.758878195  |
| C77  | 8.600976260 | 10.169653358 | 10.179572292 |
| C78  | 9.476077469 | 11.058097500 | 10.890506285 |
| C79  | 7.422731431 | 9.775793749  | 12.309459289 |
| C80  | 9.858281622 | 12.233303449 | 8.758745418  |
| C81  | 9.878601132 | 12.236190957 | 10.178710320 |
| C82  | 9.744997457 | 13.473769537 | 10.890623830 |
| C83  | 9.481380601 | 11.058042468 | 12.309683891 |
| C84  | 9.742111543 | 13.472025142 | 12.309228012 |
| C85  | 9.090901472 | 14.534962191 | 13.023151362 |
| C86  | 9.096561512 | 14.538119107 | 14.438738748 |
| C87  | 8.057826064 | 15.226709748 | 15.154142272 |
| C88  | 6.819684499 | 15.400400201 | 13.032295944 |
| C89  | 6.822702167 | 15.396406443 | 14.444622439 |
| C90  | 5.641445228 | 14.996086968 | 15.153868496 |
| C91  | 8.058346367 | 15.227794713 | 16.567360810 |
| C92  | 4.758953762 | 14.131872795 | 13.018547711 |
| C93  | 4.762893941 | 14.116724573 | 14.439753119 |
| C94  | 4.355014245 | 12.936655999 | 15.146186183 |
| C95  | 5.642712260 | 14.991651004 | 16.569852443 |
| C96  | 4.510615297 | 11.708448507 | 13.014296368 |
| C97  | 4.494796373 | 11.701693161 | 14.431916601 |
| C98  | 5.142098768 | 10.636424419 | 15.145955310 |
| C99  | 4.355485990 | 12.931482408 | 16.566218341 |
| C100 | 6.188458723 | 9.947785395  | 13.019922870 |
| C101 | 6.185091025 | 9.951239428  | 14.436438738 |
| C102 | 7.416973501 | 9.785665877  | 15.149707637 |
| C103 | 5.137327003 | 10.630864876 | 16.563816444 |
| C104 | 8.602484736 | 10.176445093 | 13.021428049 |
| C105 | 8.598776513 | 10.182823614 | 14.439954647 |
| C106 | 9.480681295 | 11.063258823 | 15.150706829 |
| C107 | 7.415030484 | 9.786984941  | 16.566307338 |
| C108 | 9.885801823 | 12.237774019 | 13.020391669 |
| C109 | 9.887997437 | 12.239891393 | 14.439991988 |

|      |              |              |              |
|------|--------------|--------------|--------------|
| C110 | 9.750328699  | 13.477829219 | 15.150766653 |
| C111 | 9.477470879  | 11.065438391 | 16.569688436 |
| C112 | 9.750940038  | 13.480301845 | 16.570175418 |
| Ir1  | -9.118480923 | -9.101359081 | 6.974873334  |
| Ir2  | -8.304016226 | -6.901535608 | 7.926985208  |
| Ir3  | -6.709179918 | -8.862263577 | 7.744208479  |
| Ir4  | -8.601770394 | -8.896897590 | 9.462171901  |

(8, 0)-Ir<sub>4</sub>

|     |              |              |             |
|-----|--------------|--------------|-------------|
| C1  | 9.845612448  | 14.563202085 | 1.969974926 |
| C2  | 9.910932912  | 14.608171987 | 3.409930748 |
| C3  | 8.822441135  | 15.306246450 | 4.096268097 |
| C4  | 8.791325767  | 15.239583841 | 1.267564749 |
| C5  | 7.567151722  | 15.497204054 | 1.980333531 |
| C6  | 7.564047395  | 15.472232033 | 3.377532279 |
| C7  | 6.338144524  | 15.293434268 | 4.097119287 |
| C8  | 6.339860357  | 15.299691645 | 1.264085421 |
| C9  | 5.270535546  | 14.656074596 | 1.978971632 |
| C10 | 5.288131890  | 14.623460275 | 3.390467433 |
| C11 | 4.417734147  | 13.736090261 | 4.111083431 |
| C12 | 4.476455164  | 13.701604004 | 1.271462848 |
| C13 | 4.114635084  | 12.519263614 | 1.988838700 |
| C14 | 4.042700556  | 12.542149526 | 3.413567431 |
| C15 | 4.235516241  | 11.311834757 | 4.119597214 |
| C16 | 4.179667202  | 11.273814084 | 1.279872929 |
| C17 | 4.748390972  | 10.163044935 | 1.985912428 |
| C18 | 4.836110772  | 10.229080922 | 3.404527977 |
| C19 | 5.773588541  | 9.411429665  | 4.117036232 |
| C20 | 5.764471503  | 9.444630836  | 1.278963682 |
| C21 | 6.982699918  | 9.191361461  | 1.994510076 |
| C22 | 6.984444265  | 9.114324231  | 3.410211616 |
| C23 | 8.204451342  | 9.356747696  | 4.120480636 |
| C24 | 8.208644360  | 9.374026594  | 1.278818538 |
| C25 | 9.283404418  | 9.998768185  | 1.989244797 |
| C26 | 9.245563517  | 10.034152731 | 3.406066273 |
| C27 | 10.019862376 | 11.000121780 | 4.123411516 |
| C28 | 10.032332866 | 10.994692912 | 1.285272763 |
| C29 | 10.347221657 | 12.191458479 | 2.002395038 |
| C30 | 10.429385568 | 12.176211369 | 3.417621189 |
| C31 | 10.353173476 | 13.416827481 | 4.129747586 |
| C32 | 10.396322259 | 13.432675612 | 1.284207450 |
| C33 | 9.837758930  | 14.539168330 | 6.251367371 |
| C34 | 9.890607975  | 14.566915797 | 7.693841749 |
| C35 | 8.815032316  | 15.253666096 | 8.394922645 |

|     |              |              |              |
|-----|--------------|--------------|--------------|
| C36 | 8.835742468  | 15.316439187 | 5.530795636  |
| C37 | 7.591674814  | 15.664321374 | 6.226084041  |
| C38 | 7.580137193  | 15.488546391 | 7.678585987  |
| C39 | 6.326852950  | 15.357581625 | 8.381305667  |
| C40 | 6.363971386  | 15.246221564 | 5.511649795  |
| C41 | 5.243166507  | 14.691731792 | 6.243158910  |
| C42 | 5.303536230  | 14.643408055 | 7.658980575  |
| C43 | 4.544085149  | 13.668578240 | 8.379319747  |
| C44 | 4.440553689  | 13.735895744 | 5.543119184  |
| C45 | 4.105999172  | 12.533365982 | 6.248430109  |
| C46 | 4.078642262  | 12.520638233 | 7.669869966  |
| C47 | 4.160167757  | 11.273393461 | 8.369374640  |
| C48 | 4.231581395  | 11.301289203 | 5.535895357  |
| C49 | 4.797667661  | 10.194110733 | 6.244044597  |
| C50 | 4.793950373  | 10.199478689 | 7.664844014  |
| C51 | 5.781399492  | 9.448055144  | 8.381211758  |
| C52 | 5.770516669  | 9.413193654  | 5.539347480  |
| C53 | 6.985913490  | 9.149047696  | 6.252803230  |
| C54 | 6.987173113  | 9.137444270  | 7.671092511  |
| C55 | 8.210230715  | 9.358624811  | 8.382531219  |
| C56 | 8.205498193  | 9.373142568  | 5.537590637  |
| C57 | 9.283296557  | 9.993857101  | 6.250594558  |
| C58 | 9.254536929  | 10.030519464 | 7.669778887  |
| C59 | 10.013513286 | 11.012139919 | 8.387193865  |
| C60 | 10.040762642 | 10.979269175 | 5.541916555  |
| C61 | 10.347997947 | 12.178792262 | 6.255701744  |
| C62 | 10.429750201 | 12.179106715 | 7.674863989  |
| C63 | 10.461165355 | 13.424354407 | 8.384856743  |
| C64 | 10.404535980 | 13.412093158 | 5.543512111  |
| C65 | 9.778264184  | 14.483310441 | 10.515207735 |
| C66 | 9.796940276  | 14.506369668 | 11.930356012 |
| C67 | 8.788976914  | 15.240680780 | 12.636047934 |
| C68 | 8.802949625  | 15.256385169 | 9.809642268  |
| C69 | 7.581595295  | 15.538715582 | 10.511313753 |
| C70 | 7.575319201  | 15.524189148 | 11.921668233 |
| C71 | 6.348402984  | 15.299241499 | 12.635416546 |
| C72 | 6.361472115  | 15.280783735 | 9.790469650  |
| C73 | 5.305127303  | 14.625376997 | 10.509298347 |
| C74 | 5.289292120  | 14.647604691 | 11.920810546 |
| C75 | 4.504081451  | 13.686540252 | 12.632813999 |
| C76 | 4.471096892  | 13.705684387 | 9.797833520  |
| C77 | 4.070337006  | 12.524484037 | 10.500704884 |
| C78 | 4.109402724  | 12.511038798 | 11.923105195 |
| C79 | 4.169653563  | 11.269235565 | 12.634632321 |

|     |              |              |              |
|-----|--------------|--------------|--------------|
| C80 | 4.205592651  | 11.288129420 | 9.791611465  |
| C81 | 4.786382923  | 10.190768529 | 10.505945046 |
| C82 | 4.753837308  | 10.167478051 | 11.929720527 |
| C83 | 5.762643171  | 9.439536622  | 12.639676995 |
| C84 | 5.765297633  | 9.418774087  | 9.800236528  |
| C85 | 6.981355702  | 9.160423557  | 10.512113378 |
| C86 | 6.979705806  | 9.179744309  | 11.927978581 |
| C87 | 8.202522513  | 9.389956842  | 12.642490518 |
| C88 | 8.204462905  | 9.378703000  | 9.800629845  |
| C89 | 9.257672431  | 10.038262273 | 10.515501287 |
| C90 | 9.273923539  | 10.021226723 | 11.932604993 |
| C91 | 10.042787227 | 10.994696405 | 12.645944797 |
| C92 | 10.043251505 | 10.998113295 | 9.803211313  |
| C93 | 10.487295718 | 12.160161787 | 10.511831807 |
| C94 | 10.449808965 | 12.168725014 | 11.934603911 |
| C95 | 10.394119238 | 13.415826446 | 12.640446650 |
| C96 | 10.413862375 | 13.405840085 | 9.805549720  |
| Ir1 | -4.129085162 | -7.462891678 | 5.653559917  |
| Ir2 | -4.279703390 | -9.727103469 | 6.784613760  |
| Ir3 | -4.672831461 | -9.514287087 | 4.271755553  |
| Ir4 | -6.385939453 | -8.613686614 | 5.920424434  |

(10, 0)-Ir<sub>4</sub>

|     |              |              |             |
|-----|--------------|--------------|-------------|
| C1  | 10.711008031 | 15.120086437 | 1.334373226 |
| C2  | 10.707213063 | 15.122786518 | 2.753325252 |
| C3  | 9.803740810  | 15.976364881 | 3.452928235 |
| C4  | 9.805050801  | 15.965469506 | 0.627119132 |
| C5  | 8.675736781  | 16.481442913 | 1.331964013 |
| C6  | 8.676404964  | 16.489760805 | 2.745846613 |
| C7  | 7.444476076  | 16.616210399 | 3.458116005 |
| C8  | 7.441695960  | 16.604273416 | 0.626559125 |
| C9  | 6.234164875  | 16.326213025 | 1.336222642 |
| C10 | 6.236476894  | 16.327208165 | 2.753798120 |
| C11 | 5.182364243  | 15.679038536 | 3.464521776 |
| C12 | 5.173828726  | 15.683524392 | 0.629805667 |
| C13 | 4.357365518  | 14.753785393 | 1.337480314 |
| C14 | 4.362152878  | 14.751396033 | 2.759263897 |
| C15 | 3.857844899  | 13.619399225 | 3.467257688 |
| C16 | 3.852345067  | 13.623156336 | 0.628738703 |
| C17 | 3.711491130  | 12.393043495 | 1.336903540 |
| C18 | 3.712551463  | 12.391214083 | 2.758424186 |
| C19 | 3.949594364  | 11.175010204 | 3.467103929 |
| C20 | 3.949643572  | 11.178089241 | 0.627975402 |
| C21 | 4.555226552  | 10.096286426 | 1.336711997 |



|     |              |              |             |
|-----|--------------|--------------|-------------|
| C22 | 4.555025318  | 10.094000857 | 2.758285081 |
| C23 | 5.468549487  | 9.257910564  | 3.466619637 |
| C24 | 5.469642149  | 9.261198769  | 0.629245115 |
| C25 | 6.599168699  | 8.752503075  | 1.337650063 |
| C26 | 6.599131361  | 8.750601780  | 2.759058932 |
| C27 | 7.830539378  | 8.622039792  | 3.468173861 |
| C28 | 7.831392729  | 8.624918994  | 0.629668447 |
| C29 | 9.040798833  | 8.890635839  | 1.338744149 |
| C30 | 9.040818218  | 8.889730974  | 2.759929951 |
| C31 | 10.103511689 | 9.526307637  | 3.469084177 |
| C32 | 10.105277268 | 9.526856708  | 0.630736184 |
| C33 | 10.921247769 | 10.457235858 | 1.338915613 |
| C34 | 10.919628569 | 10.458541056 | 2.761739004 |
| C35 | 11.411028015 | 11.594027434 | 3.469775092 |
| C36 | 11.419167720 | 11.590985549 | 0.630792764 |
| C37 | 11.551872864 | 12.821922489 | 1.339345212 |
| C38 | 11.546157783 | 12.824347689 | 2.760322848 |
| C39 | 11.298494688 | 14.038723952 | 3.465959031 |
| C40 | 11.311402262 | 14.035751806 | 0.629326821 |
| C41 | 10.687769936 | 15.127802426 | 5.586793198 |
| C42 | 10.679538420 | 15.126515148 | 7.010786082 |
| C43 | 9.842333694  | 16.032884372 | 7.708845442 |
| C44 | 9.805404625  | 15.996863849 | 4.869258994 |
| C45 | 8.694501927  | 16.556830257 | 5.565614086 |
| C46 | 8.748239420  | 16.680082348 | 6.994726481 |
| C47 | 7.414323463  | 16.761349286 | 7.722417169 |
| C48 | 7.449197534  | 16.642119314 | 4.872880016 |
| C49 | 6.235748472  | 16.345612060 | 5.589924414 |
| C50 | 6.226085859  | 16.350647443 | 7.003976190 |
| C51 | 5.201432222  | 15.670547165 | 7.718531752 |
| C52 | 5.188997036  | 15.678543735 | 4.885941210 |
| C53 | 4.373583608  | 14.746603116 | 5.595268639 |
| C54 | 4.379385172  | 14.742063618 | 7.015478892 |
| C55 | 3.868367386  | 13.615239899 | 7.725014737 |
| C56 | 3.861488534  | 13.617546662 | 4.888195288 |
| C57 | 3.715591632  | 12.388787959 | 5.596645184 |
| C58 | 3.716341901  | 12.387190999 | 7.017740937 |
| C59 | 3.949288221  | 11.171104900 | 7.727245620 |
| C60 | 3.949569966  | 11.172775069 | 4.887793569 |
| C61 | 4.553710668  | 10.090537961 | 5.596856185 |
| C62 | 4.553578817  | 10.088798901 | 7.018644561 |
| C63 | 5.467569268  | 9.253409245  | 7.727245853 |
| C64 | 5.468277938  | 9.255640937  | 4.888944377 |
| C65 | 6.597932997  | 8.746753133  | 5.597624878 |

|      |              |              |              |
|------|--------------|--------------|--------------|
| C66  | 6.597992826  | 8.745131839  | 7.019268476  |
| C67  | 7.829737563  | 8.615940011  | 7.728522742  |
| C68  | 7.830441847  | 8.619790445  | 4.889170858  |
| C69  | 9.040042244  | 8.884986766  | 5.598687085  |
| C70  | 9.040280933  | 8.882450042  | 7.019797142  |
| C71  | 10.103708566 | 9.518964164  | 7.729269967  |
| C72  | 10.103448816 | 9.524529627  | 4.890690464  |
| C73  | 10.915531305 | 10.457389801 | 5.599516080  |
| C74  | 10.915948307 | 10.455237720 | 7.021796223  |
| C75  | 11.401165123 | 11.592968928 | 7.730151319  |
| C76  | 11.405691014 | 11.596193325 | 4.892365842  |
| C77  | 11.526160775 | 12.827372740 | 5.600167156  |
| C78  | 11.520725427 | 12.827606172 | 7.021885376  |
| C79  | 11.270139635 | 14.037984582 | 7.728609734  |
| C80  | 11.284390502 | 14.041918105 | 4.887829961  |
| C81  | 10.723851317 | 15.134625027 | 9.869265503  |
| C82  | 10.715374539 | 15.133350417 | 11.289248433 |
| C83  | 9.830572286  | 16.007884392 | 12.009258505 |
| C84  | 9.901508778  | 16.077726090 | 9.163519524  |
| C85  | 8.725052187  | 16.620474115 | 9.858778944  |
| C86  | 8.709666133  | 16.590745323 | 11.329887425 |
| C87  | 7.453948871  | 16.654371254 | 12.017474405 |
| C88  | 7.428090369  | 16.669039401 | 9.156514932  |
| C89  | 6.254934509  | 16.318331226 | 9.858335546  |
| C90  | 6.259516953  | 16.328696425 | 11.289851630 |
| C91  | 5.201379835  | 15.679303943 | 11.988751558 |
| C92  | 5.201927404  | 15.667214794 | 9.143799614  |
| C93  | 4.384057513  | 14.744133034 | 9.852655679  |
| C94  | 4.383421985  | 14.748179405 | 11.277079081 |
| C95  | 3.868882072  | 13.622789554 | 11.984540537 |
| C96  | 3.868445619  | 13.615617558 | 9.146543991  |
| C97  | 3.717920683  | 12.389215407 | 9.856019707  |
| C98  | 3.719207011  | 12.391908589 | 11.277225674 |
| C99  | 3.952309999  | 11.176755417 | 11.986931812 |
| C100 | 3.949771109  | 11.171393441 | 9.148010006  |
| C101 | 4.554029020  | 10.090085389 | 9.857499143  |
| C102 | 4.554991585  | 10.092276436 | 11.279082519 |
| C103 | 5.468824832  | 9.257296223  | 11.987742671 |
| C104 | 5.467990933  | 9.253461793  | 9.149719374  |
| C105 | 6.597872880  | 8.745275511  | 9.858387458  |
| C106 | 6.598441331  | 8.746808619  | 11.280023817 |
| C107 | 7.830159927  | 8.618808599  | 11.989197482 |
| C108 | 7.830157979  | 8.615620372  | 9.149732737  |
| C109 | 9.040229849  | 8.880919141  | 9.859072846  |

|      |              |              |              |
|------|--------------|--------------|--------------|
| C110 | 9.040679892  | 8.882895379  | 11.280347445 |
| C111 | 10.103952859 | 9.520455832  | 11.989249594 |
| C112 | 10.104270419 | 9.518130086  | 9.150393539  |
| C113 | 10.916220251 | 10.452683643 | 9.858713261  |
| C114 | 10.917555447 | 10.453606617 | 11.280901293 |
| C115 | 11.408596832 | 11.589948758 | 11.988563065 |
| C116 | 11.401180542 | 11.592546740 | 9.151429277  |
| C117 | 11.524613318 | 12.823387535 | 9.860474371  |
| C118 | 11.531910510 | 12.822505317 | 11.280549497 |
| C119 | 11.290633798 | 14.036042781 | 11.991763554 |
| C120 | 11.277025253 | 14.039506646 | 9.153817756  |
| C121 | 10.712431283 | 15.122415745 | 14.124705978 |
| C122 | 10.712943271 | 15.120619390 | 15.543370317 |
| C123 | 9.807220076  | 15.966766746 | 16.251259588 |
| C124 | 9.817438864  | 15.985914363 | 13.423043422 |
| C125 | 8.683648213  | 16.501044290 | 14.134060906 |
| C126 | 8.679371925  | 16.486694718 | 15.546360641 |
| C127 | 7.442742615  | 16.605726142 | 16.252675160 |
| C128 | 7.447232155  | 16.628482980 | 13.427865069 |
| C129 | 6.239712831  | 16.331655935 | 14.126803465 |
| C130 | 6.235320331  | 16.327881935 | 15.544328201 |
| C131 | 5.174538954  | 15.684948841 | 16.248982596 |
| C132 | 5.186842142  | 15.684990547 | 13.412134499 |
| C133 | 4.364108886  | 14.756722624 | 14.116428815 |
| C134 | 4.357621593  | 14.756706022 | 15.538938665 |
| C135 | 3.852636911  | 13.624707731 | 16.246480076 |
| C136 | 3.862320404  | 13.624075346 | 13.407535638 |
| C137 | 3.714969153  | 12.395549295 | 14.115956898 |
| C138 | 3.712225071  | 12.395001014 | 15.537755951 |
| C139 | 3.950004618  | 11.179275120 | 16.246787728 |
| C140 | 3.952349712  | 11.178382614 | 13.408022549 |
| C141 | 4.556005290  | 10.097073937 | 14.117153119 |
| C142 | 4.556041181  | 10.097579748 | 15.538896423 |
| C143 | 5.469528571  | 9.261961282  | 16.247101240 |
| C144 | 5.469536556  | 9.259540645  | 13.409896838 |
| C145 | 6.598975714  | 8.751544636  | 14.118439686 |
| C146 | 6.599464933  | 8.752810754  | 15.539854602 |
| C147 | 7.830864971  | 8.624798268  | 16.248782406 |
| C148 | 7.830832972  | 8.621325954  | 13.410226391 |
| C149 | 9.040453219  | 8.887498831  | 14.119374266 |
| C150 | 9.041029062  | 8.889545908  | 15.540391706 |
| C151 | 10.104916805 | 9.525924621  | 16.249088388 |
| C152 | 10.104689457 | 9.522605265  | 13.410593503 |
| C153 | 10.920083606 | 10.454483553 | 14.118370201 |

|      |              |              |              |
|------|--------------|--------------|--------------|
| C154 | 10.921582213 | 10.455702221 | 15.540908777 |
| C155 | 11.419023533 | 11.589814828 | 16.248730418 |
| C156 | 11.412946142 | 11.589577572 | 13.410125746 |
| C157 | 11.545638265 | 12.820544625 | 14.119120072 |
| C158 | 11.551435059 | 12.820543442 | 15.539698532 |
| C159 | 11.311494511 | 14.034808053 | 16.248935941 |
| C160 | 11.300127326 | 14.035165543 | 13.413168018 |
| Ir1  | -5.297664414 | -6.174875812 | 8.806100301  |
| Ir2  | -4.521778822 | -8.577524894 | 8.428990406  |
| Ir3  | -6.807004181 | -7.836958911 | 7.602753532  |
| Ir4  | -6.383425703 | -8.054857705 | 10.085649344 |

(7, 7)-Ir<sub>4</sub>

|     |              |              |             |
|-----|--------------|--------------|-------------|
| C1  | 11.590210784 | 14.757099924 | 0.463301027 |
| C2  | 7.959662871  | 16.769398706 | 0.456435682 |
| C3  | 10.613368708 | 15.803128708 | 0.459836528 |
| C4  | 10.032068368 | 16.214743857 | 1.685441592 |
| C5  | 6.535886393  | 16.569467469 | 0.463932031 |
| C6  | 5.872330059  | 16.294609899 | 1.689737243 |
| C7  | 8.683220978  | 16.706407444 | 1.671673364 |
| C8  | 4.197894357  | 14.966257600 | 0.468171057 |
| C9  | 4.690674623  | 15.480631585 | 1.695216722 |
| C10 | 3.084664450  | 10.944120707 | 0.466932268 |
| C11 | 3.442544422  | 13.747434469 | 0.467516122 |
| C12 | 3.200797203  | 13.074497375 | 1.696300597 |
| C13 | 3.532181354  | 9.583627377  | 0.466864851 |
| C14 | 3.899914676  | 8.972817924  | 1.696577013 |
| C15 | 3.018390809  | 11.654017234 | 1.696420478 |
| C16 | 5.501185627  | 7.564524527  | 0.466675089 |
| C17 | 4.898566483  | 7.946202131  | 1.696437055 |
| C18 | 9.651441333  | 7.450088732  | 0.466035611 |
| C19 | 6.853256620  | 7.092501854  | 0.466423515 |
| C20 | 7.562461763  | 7.018496739  | 1.696095136 |
| C21 | 10.847491078 | 8.239164797  | 0.465784511 |
| C22 | 11.342836017 | 8.750578767  | 1.695543275 |
| C23 | 8.983430888  | 7.200433373  | 1.695798668 |
| C24 | 12.317823099 | 10.649750756 | 0.466190505 |
| C25 | 12.085991846 | 9.974845040  | 1.695365075 |
| C26 | 12.480012113 | 12.073219384 | 0.466444683 |
| C27 | 12.398336235 | 12.783649724 | 1.695060860 |
| C28 | 11.947842789 | 14.143904958 | 1.694587958 |
| C29 | 11.583785253 | 14.759664768 | 2.924936559 |
| C30 | 7.967651178  | 16.817794401 | 2.896972524 |
| C31 | 10.632107998 | 15.826413154 | 2.922489979 |

|     |              |              |             |
|-----|--------------|--------------|-------------|
| C32 | 10.083774157 | 16.287717542 | 4.161343469 |
| C33 | 6.538633614  | 16.565623363 | 2.917366245 |
| C34 | 5.876538563  | 16.282560936 | 4.156493407 |
| C35 | 8.721838461  | 16.859304387 | 4.146377043 |
| C36 | 4.198244749  | 14.959130753 | 2.925555709 |
| C37 | 4.691606127  | 15.462659424 | 4.155002163 |
| C38 | 3.083028846  | 10.944005953 | 2.926177630 |
| C39 | 3.440215719  | 13.744087295 | 2.926107792 |
| C40 | 3.197483289  | 13.073211513 | 4.155710285 |
| C41 | 3.531309627  | 9.583756502  | 2.926245549 |
| C42 | 3.899524532  | 8.973090820  | 4.156166044 |
| C43 | 3.015676146  | 11.653180421 | 4.156210824 |
| C44 | 5.501126305  | 7.564659278  | 2.926183421 |
| C45 | 4.898459341  | 7.946616924  | 4.155953566 |
| C46 | 9.651546972  | 7.449160542  | 2.925535833 |
| C47 | 6.853208326  | 7.092425540  | 2.925937656 |
| C48 | 7.562569960  | 7.018734776  | 4.155692750 |
| C49 | 10.847326754 | 8.238347657  | 2.925233761 |
| C50 | 11.342802693 | 8.750532168  | 4.154979646 |
| C51 | 8.983441836  | 7.200499627  | 4.155516309 |
| C52 | 12.312131942 | 10.650471845 | 2.924679086 |
| C53 | 12.084721902 | 9.974848519  | 4.154502332 |
| C54 | 12.469309572 | 12.073610305 | 2.924015327 |
| C55 | 12.392925990 | 12.781722918 | 4.154186601 |
| C56 | 11.944255899 | 14.139303143 | 4.154447235 |
| C57 | 11.587086671 | 14.751553193 | 5.385346407 |
| C58 | 7.944056325  | 16.968804517 | 5.413233946 |
| C59 | 10.626556625 | 15.808413310 | 5.393041083 |
| C60 | 10.023586743 | 16.182890582 | 6.620099286 |
| C61 | 6.523337941  | 16.568272322 | 5.391473330 |
| C62 | 5.874993837  | 16.273720920 | 6.628201267 |
| C63 | 8.709233855  | 16.779868020 | 6.635205528 |
| C64 | 4.202027840  | 14.953417241 | 5.384346168 |
| C65 | 4.701675216  | 15.464405789 | 6.620635996 |
| C66 | 3.082079314  | 10.943714201 | 5.386460213 |
| C67 | 3.439086901  | 13.743238690 | 5.386039471 |
| C68 | 3.198052758  | 13.073969332 | 6.616771132 |
| C69 | 3.531167403  | 9.583817500  | 5.386081102 |
| C70 | 3.899911321  | 8.973003254  | 6.615708946 |
| C71 | 3.016365066  | 11.653424089 | 6.616290233 |
| C72 | 5.501202953  | 7.564914626  | 5.385621597 |
| C73 | 4.898589164  | 7.946624101  | 6.615434899 |
| C74 | 9.651687017  | 7.449906570  | 5.385277952 |
| C75 | 6.853195587  | 7.092808088  | 5.385475012 |

|      |              |              |             |
|------|--------------|--------------|-------------|
| C76  | 7.562582031  | 7.019054829  | 6.615154818 |
| C77  | 10.847706018 | 8.238724086  | 5.385171130 |
| C78  | 11.343930731 | 8.750916721  | 6.614647356 |
| C79  | 8.983456981  | 7.201185716  | 6.615027149 |
| C80  | 12.315648947 | 10.649486416 | 5.384288925 |
| C81  | 12.089486838 | 9.974113394  | 6.614418030 |
| C82  | 12.475040305 | 12.071919670 | 5.383684037 |
| C83  | 12.406117232 | 12.780237737 | 6.614110565 |
| C84  | 11.952603147 | 14.136467551 | 6.614284090 |
| C85  | 11.588874761 | 14.748378259 | 7.844109170 |
| C86  | 7.959206188  | 16.850709240 | 7.854676292 |
| C87  | 10.599593535 | 15.782130560 | 7.842158922 |
| C88  | 10.009268538 | 16.195002165 | 9.072014627 |
| C89  | 6.532668226  | 16.576298544 | 7.850228564 |
| C90  | 5.872244456  | 16.299200963 | 9.073189626 |
| C91  | 8.677113294  | 16.717143637 | 9.077704519 |
| C92  | 4.200809197  | 14.958164654 | 7.849363481 |
| C93  | 4.693585623  | 15.480829651 | 9.075563422 |
| C94  | 3.083875631  | 10.944102251 | 7.846083062 |
| C95  | 3.440929388  | 13.745131942 | 7.847176284 |
| C96  | 3.201061015  | 13.075109735 | 9.076901060 |
| C97  | 3.532038432  | 9.583850574  | 7.845614297 |
| C98  | 3.900342575  | 8.972958598  | 9.075151538 |
| C99  | 3.018685759  | 11.653899464 | 9.075920140 |
| C100 | 5.501229264  | 7.564746144  | 7.845081693 |
| C101 | 4.898767164  | 7.946253783  | 9.074937915 |
| C102 | 9.651611753  | 7.450642915  | 7.844625880 |
| C103 | 6.853265228  | 7.092797479  | 7.844881808 |
| C104 | 7.562499291  | 7.019072744  | 9.074583546 |
| C105 | 10.847964060 | 8.239544484  | 7.844440643 |
| C106 | 11.343702424 | 8.751435617  | 9.074281564 |
| C107 | 8.983364313  | 7.201404961  | 9.074326987 |
| C108 | 12.321116332 | 10.648597794 | 7.844301860 |
| C109 | 12.089759134 | 9.974316604  | 9.074366394 |
| C110 | 12.484780018 | 12.071657457 | 7.844499327 |
| C111 | 12.410595725 | 12.781556967 | 9.074137106 |
| C112 | 11.957328880 | 14.139992305 | 9.073500720 |
| Ir1  | -8.843485220 | -7.477911984 | 4.434314422 |
| Ir2  | -7.578804310 | -5.279351302 | 4.547672754 |
| Ir3  | -6.457955081 | -7.328450699 | 3.570385724 |
| Ir4  | -6.923696427 | -7.201563718 | 6.081099404 |

(8, 8)-Ir<sub>4</sub>

|    |              |              |             |
|----|--------------|--------------|-------------|
| C1 | 12.219726735 | 16.251031011 | 0.811995265 |
|----|--------------|--------------|-------------|

|     |              |              |             |
|-----|--------------|--------------|-------------|
| C2  | 11.073061298 | 17.117749050 | 0.806390210 |
| C3  | 10.410841372 | 17.420365238 | 2.008724002 |
| C4  | 12.678034247 | 15.698277429 | 2.034036055 |
| C5  | 8.295340403  | 17.659981682 | 0.800558775 |
| C6  | 9.006978228  | 17.694627921 | 2.020880829 |
| C7  | 4.556646458  | 15.738711446 | 0.808677771 |
| C8  | 6.900573930  | 17.333552381 | 0.805211551 |
| C9  | 6.248001948  | 17.044876797 | 2.036995915 |
| C10 | 3.729407611  | 14.569365714 | 0.809233874 |
| C11 | 3.429402529  | 13.924249663 | 2.039066756 |
| C12 | 5.063578431  | 16.238045737 | 2.037934527 |
| C13 | 3.041851401  | 11.824466947 | 0.810349379 |
| C14 | 3.082199437  | 12.534665363 | 2.039750792 |
| C15 | 4.686489502  | 7.980256568  | 0.811816895 |
| C16 | 3.237119987  | 10.406166241 | 0.810885967 |
| C17 | 3.470920549  | 9.733394578  | 2.040829339 |
| C18 | 5.849807573  | 7.144468018  | 0.812394383 |
| C19 | 6.499336858  | 6.853388463  | 2.042360364 |
| C20 | 4.202642924  | 8.502775034  | 2.041379599 |
| C21 | 8.609542255  | 6.542345705  | 0.813418121 |
| C22 | 7.898618418  | 6.548737498  | 2.042944219 |
| C23 | 12.358302896 | 8.404369664  | 0.815112995 |
| C24 | 10.014328125 | 6.820781990  | 0.814014983 |
| C25 | 10.669841173 | 7.097997148  | 2.043951261 |
| C26 | 13.160977414 | 9.590449383  | 0.815711289 |
| C27 | 13.443453760 | 10.243975136 | 2.045536753 |
| C28 | 11.856002061 | 7.900691090  | 2.044504296 |
| C29 | 13.785057883 | 12.350221159 | 0.815835582 |
| C30 | 13.756886544 | 11.641035158 | 2.045990767 |
| C31 | 13.586273547 | 13.767930624 | 0.815182202 |
| C32 | 13.364510079 | 14.445129266 | 2.043058070 |
| C33 | 12.212071468 | 16.245447223 | 3.252182808 |
| C34 | 11.097541186 | 17.154730365 | 3.218579976 |
| C35 | 10.440981451 | 17.552972471 | 4.461293885 |
| C36 | 12.651945250 | 15.693466322 | 4.511784887 |
| C37 | 8.291631135  | 17.672884078 | 3.256299905 |
| C38 | 8.990680034  | 17.703831760 | 4.487755158 |
| C39 | 4.555564712  | 15.739222333 | 3.267146913 |
| C40 | 6.896297886  | 17.332811381 | 3.264595306 |
| C41 | 6.250793576  | 17.035040592 | 4.495136039 |
| C42 | 3.728780501  | 14.569849781 | 3.268437257 |
| C43 | 3.428663390  | 13.924303515 | 4.498409745 |
| C44 | 5.064365989  | 16.236220172 | 4.497073117 |
| C45 | 3.041960872  | 11.824624870 | 3.269697270 |

|     |              |              |             |
|-----|--------------|--------------|-------------|
| C46 | 3.081757306  | 12.534816428 | 4.499142656 |
| C47 | 4.686546545  | 7.980311779  | 3.271326546 |
| C48 | 3.237116100  | 10.406259507 | 3.270327944 |
| C49 | 3.470962441  | 9.733465536  | 4.500258057 |
| C50 | 5.849788234  | 7.144465846  | 3.271909065 |
| C51 | 6.499394243  | 6.853447456  | 4.501871033 |
| C52 | 4.202684027  | 8.502934770  | 4.500856931 |
| C53 | 8.609557780  | 6.542363932  | 3.272884386 |
| C54 | 7.898666868  | 6.548924303  | 4.502454011 |
| C55 | 12.358401378 | 8.404436742  | 3.274385020 |
| C56 | 10.014281202 | 6.820910394  | 3.273448641 |
| C57 | 10.669922067 | 7.097881469  | 4.503397010 |
| C58 | 13.160745739 | 9.590715781  | 3.274871227 |
| C59 | 13.442688625 | 10.243862991 | 4.505002519 |
| C60 | 11.856228399 | 7.900363721  | 4.503934346 |
| C61 | 13.781415266 | 12.351978770 | 3.275929029 |
| C62 | 13.753323241 | 11.641422791 | 4.505528510 |
| C63 | 13.578457997 | 13.769525041 | 3.275795012 |
| C64 | 13.340334540 | 14.440239602 | 4.507648973 |
| C65 | 12.223045275 | 16.256483554 | 5.753346477 |
| C66 | 11.183543104 | 17.281148468 | 5.724371609 |
| C67 | 10.486041355 | 17.587697835 | 6.991334815 |
| C68 | 12.659106815 | 15.700277698 | 6.978820102 |
| C69 | 8.297204618  | 17.635529194 | 5.728943816 |
| C70 | 9.013542116  | 17.684469059 | 6.963445198 |
| C71 | 4.556289115  | 15.737411017 | 5.727562516 |
| C72 | 6.908238382  | 17.307030148 | 5.728056890 |
| C73 | 6.257770247  | 17.025591721 | 6.957854003 |
| C74 | 3.728118498  | 14.569342925 | 5.728138096 |
| C75 | 3.428468929  | 13.924045728 | 6.958329078 |
| C76 | 5.066434892  | 16.232817135 | 6.957723448 |
| C77 | 3.041459793  | 11.824598491 | 5.729112406 |
| C78 | 3.081444034  | 12.534555553 | 6.958820672 |
| C79 | 4.686573505  | 7.980392439  | 5.730818628 |
| C80 | 3.237029872  | 10.406348498 | 5.729767118 |
| C81 | 3.470897846  | 9.733528903  | 6.959764239 |
| C82 | 5.849872701  | 7.144635423  | 5.731408288 |
| C83 | 6.499454969  | 6.853555392  | 6.961363417 |
| C84 | 4.202738834  | 8.502999851  | 6.960347873 |
| C85 | 8.609632195  | 6.542440669  | 5.732411586 |
| C86 | 7.898695229  | 6.548793793  | 6.961951692 |
| C87 | 12.358648638 | 8.403766489  | 5.733943392 |
| C88 | 10.014433498 | 6.820667487  | 5.732990932 |
| C89 | 10.670061641 | 7.097633548  | 6.962957556 |



|      |              |              |             |
|------|--------------|--------------|-------------|
| C90  | 13.161006782 | 9.589902764  | 5.734537409 |
| C91  | 13.443405533 | 10.242499769 | 6.964601088 |
| C92  | 11.856421704 | 7.899933778  | 6.963583149 |
| C93  | 13.776936333 | 12.350991595 | 5.736664783 |
| C94  | 13.754108685 | 11.639465743 | 6.965359656 |
| C95  | 13.566287564 | 13.766358460 | 5.738691767 |
| C96  | 13.338507027 | 14.441002503 | 6.970233313 |
| C97  | 12.238074136 | 16.267242828 | 8.207951005 |
| C98  | 11.163791092 | 17.239171940 | 8.224613142 |
| C99  | 10.430902923 | 17.441985780 | 9.428925692 |
| C100 | 12.675514540 | 15.701551789 | 9.422383754 |
| C101 | 8.305233037  | 17.637000096 | 8.186397719 |
| C102 | 9.015651179  | 17.674889757 | 9.417896783 |
| C103 | 4.557602900  | 15.736786399 | 8.188125384 |
| C104 | 6.911652707  | 17.312664101 | 8.187756465 |
| C105 | 6.253870351  | 17.036268127 | 9.416590213 |
| C106 | 3.728744487  | 14.568844005 | 8.188107923 |
| C107 | 3.429219940  | 13.923745138 | 9.417958115 |
| C108 | 5.066048833  | 16.235366656 | 9.416916880 |
| C109 | 3.041589362  | 11.824493727 | 8.188802469 |
| C110 | 3.081846391  | 12.534505859 | 9.418414821 |
| C111 | 4.686635999  | 7.980465072  | 8.190307825 |
| C112 | 3.236997216  | 10.406217893 | 8.189366440 |
| C113 | 3.470937452  | 9.733425084  | 9.419330042 |
| C114 | 5.849863738  | 7.144598796  | 8.190895562 |
| C115 | 6.499362655  | 6.853373173  | 9.420852061 |
| C116 | 4.202701508  | 8.502896584  | 9.419873443 |
| C117 | 8.609631452  | 6.542293029  | 8.191906665 |
| C118 | 7.898661932  | 6.548797525  | 9.421442769 |
| C119 | 12.358666525 | 8.403622745  | 8.193535798 |
| C120 | 10.014399022 | 6.820689816  | 8.192513827 |
| C121 | 10.669912234 | 7.097810178  | 9.422501448 |
| C122 | 13.161303744 | 9.589520012  | 8.194217466 |
| C123 | 13.443603903 | 10.242738132 | 9.424037985 |
| C124 | 11.856201970 | 7.900343483  | 9.423139093 |
| C125 | 13.781290185 | 12.349530085 | 8.194924234 |
| C126 | 13.756603419 | 11.639607413 | 9.424647975 |
| C127 | 13.575938539 | 13.765333170 | 8.196013228 |
| C128 | 13.358975801 | 14.443129080 | 9.424608662 |
| Ir1  | -3.576935324 | -5.120924393 | 4.772869203 |
| Ir2  | -3.138621087 | -7.594411747 | 4.421900659 |
| Ir3  | -5.500509939 | -6.639821025 | 4.092682430 |
| Ir4  | -4.523743705 | -6.809753425 | 6.422458844 |

(10, 10)-Ir<sub>4</sub>

|     |              |              |             |
|-----|--------------|--------------|-------------|
| C1  | 12.056264051 | 17.568635008 | 0.246277738 |
| C2  | 10.934353782 | 18.450616764 | 0.245443986 |
| C3  | 10.320272171 | 18.815501364 | 1.462660960 |
| C4  | 12.537795408 | 17.050208114 | 1.475613416 |
| C5  | 8.257583049  | 19.397869732 | 0.245526665 |
| C6  | 8.972957615  | 19.302525761 | 1.454416507 |
| C7  | 4.131346903  | 18.473596979 | 0.246297392 |
| C8  | 6.819649158  | 19.388502039 | 0.245339835 |
| C9  | 6.115494240  | 19.263720736 | 1.468717993 |
| C10 | 2.967831577  | 17.642026689 | 0.246781961 |
| C11 | 2.459077184  | 17.146947782 | 1.476832492 |
| C12 | 4.764580689  | 18.800646095 | 1.474003442 |
| C13 | 1.249880494  | 15.385646526 | 0.247070067 |
| C14 | 1.593077458  | 16.008700351 | 1.476861848 |
| C15 | 0.657548759  | 11.209886213 | 0.246953263 |
| C16 | 0.758701791  | 14.042870624 | 0.247030020 |
| C17 | 0.620896745  | 13.345339222 | 1.476794399 |
| C18 | 1.058923345  | 9.836067842  | 0.246920500 |
| C19 | 1.365030323  | 9.194581441  | 1.476667270 |
| C20 | 0.570181734  | 11.915881874 | 1.476744901 |
| C21 | 2.673619557  | 7.506014343  | 0.246864150 |
| C22 | 2.179603233  | 8.017282465  | 1.476630819 |
| C23 | 6.494721467  | 5.715319255  | 0.246781254 |
| C24 | 3.816160921  | 6.644846719  | 0.246834586 |
| C25 | 4.443033852  | 6.308713436  | 1.476574976 |
| C26 | 7.924749432  | 5.695695007  | 0.246750658 |
| C27 | 8.628715783  | 5.800691978  | 1.476477903 |
| C28 | 5.794062009  | 5.839683358  | 1.476542233 |
| C29 | 10.627517814 | 6.552856873  | 0.246695165 |
| C30 | 9.992066957  | 6.233899763  | 1.476432543 |
| C31 | 13.484626751 | 9.661331574  | 0.246612208 |
| C32 | 11.792550692 | 7.384607638  | 0.246663165 |
| C33 | 12.298998502 | 7.883444831  | 1.476376758 |
| C34 | 13.954351614 | 11.012137000 | 0.246588375 |
| C35 | 14.082203018 | 11.711735347 | 1.476715441 |
| C36 | 13.151185070 | 9.033038783  | 1.476344914 |
| C37 | 14.030034854 | 13.845487312 | 0.246636532 |
| C38 | 14.119150543 | 13.141173075 | 1.477072934 |
| C39 | 13.632135911 | 15.218744362 | 0.246721603 |
| C40 | 13.330624942 | 15.862454639 | 1.476588448 |
| C41 | 12.057806389 | 17.583262772 | 2.701073856 |
| C42 | 10.959690232 | 18.493975440 | 2.688908246 |
| C43 | 10.383528317 | 18.943385641 | 3.919237202 |

|     |              |              |             |
|-----|--------------|--------------|-------------|
| C44 | 12.531749733 | 17.064340208 | 3.935423142 |
| C45 | 8.260377033  | 19.462793562 | 2.669356165 |
| C46 | 8.987511571  | 19.441544472 | 3.921495055 |
| C47 | 4.133928717  | 18.474394083 | 2.705667407 |
| C48 | 6.820324405  | 19.400596135 | 2.691936699 |
| C49 | 6.123233088  | 19.251689815 | 3.931009431 |
| C50 | 2.969598775  | 17.642864766 | 2.706279016 |
| C51 | 2.461361416  | 17.146329643 | 3.936522406 |
| C52 | 4.771536952  | 18.793708381 | 3.934565943 |
| C53 | 1.250065325  | 15.386103656 | 2.706631206 |
| C54 | 1.594108611  | 16.009241158 | 3.936422143 |
| C55 | 0.657486325  | 11.209913750 | 2.706487603 |
| C56 | 0.758587813  | 14.043210778 | 2.706604867 |
| C57 | 0.620621924  | 13.345459573 | 3.936267285 |
| C58 | 1.058897569  | 9.836077173  | 2.706440793 |
| C59 | 1.365013245  | 9.194573469  | 3.936174939 |
| C60 | 0.570018590  | 11.915985420 | 3.936240609 |
| C61 | 2.673633584  | 7.506026700  | 2.706374002 |
| C62 | 2.179606096  | 8.017306400  | 3.936138840 |
| C63 | 6.494737720  | 5.715321777  | 2.706279904 |
| C64 | 3.816169539  | 6.644852996  | 2.706340801 |
| C65 | 4.443053661  | 6.308715985  | 3.936079285 |
| C66 | 7.924756328  | 5.695676377  | 2.706243401 |
| C67 | 8.628741659  | 5.800643372  | 3.935982853 |
| C68 | 5.794071462  | 5.839685673  | 3.936046956 |
| C69 | 10.627523628 | 6.552774967  | 2.706165272 |
| C70 | 9.992087670  | 6.233791501  | 3.935940688 |
| C71 | 13.484106543 | 9.661267971  | 2.706219259 |
| C72 | 11.792499791 | 7.384480446  | 2.706106138 |
| C73 | 12.298920023 | 7.883218819  | 3.935890202 |
| C74 | 13.952839299 | 11.012141109 | 2.706316741 |
| C75 | 14.079328611 | 11.712459985 | 3.936192211 |
| C76 | 13.150774150 | 9.032834792  | 3.935864404 |
| C77 | 14.024563764 | 13.847379546 | 2.707176411 |
| C78 | 14.113386362 | 13.141808230 | 3.936559844 |
| C79 | 13.625021999 | 15.220879471 | 2.707970519 |
| C80 | 13.318879279 | 15.868969252 | 3.936466904 |
| C81 | 12.051387408 | 17.602690366 | 5.165337546 |
| C82 | 10.977531302 | 18.551879651 | 5.166599991 |
| C83 | 10.393209007 | 18.928037107 | 6.421361027 |
| C84 | 12.532296552 | 17.064522198 | 6.394747782 |
| C85 | 8.234620956  | 19.429388516 | 5.166031041 |
| C86 | 8.991442927  | 19.402658786 | 6.431193904 |
| C87 | 4.139844831  | 18.468534738 | 5.166746861 |

|      |              |              |             |
|------|--------------|--------------|-------------|
| C88  | 6.821372943  | 19.358981280 | 5.171294716 |
| C89  | 6.123628328  | 19.247528472 | 6.405238270 |
| C90  | 2.973717584  | 17.640668822 | 5.166312465 |
| C91  | 2.460900859  | 17.145876040 | 6.395728292 |
| C92  | 4.771222563  | 18.792436190 | 6.399537191 |
| C93  | 1.250114584  | 15.386015536 | 5.165996914 |
| C94  | 1.593784686  | 16.008980887 | 6.395659755 |
| C95  | 0.657350926  | 11.209882598 | 5.165948080 |
| C96  | 0.758509703  | 14.043380119 | 5.165974098 |
| C97  | 0.620518097  | 13.345406467 | 6.395694131 |
| C98  | 1.058869412  | 9.836120181  | 5.165918799 |
| C99  | 1.364995696  | 9.194568964  | 6.395648684 |
| C100 | 0.569964356  | 11.915955394 | 6.395671498 |
| C101 | 2.673640380  | 7.506017764  | 5.165869753 |
| C102 | 2.179598531  | 8.017303154  | 6.395620638 |
| C103 | 6.494750736  | 5.715313643  | 5.165783805 |
| C104 | 3.816175775  | 6.644865847  | 5.165838022 |
| C105 | 4.443050944  | 6.308716050  | 6.395574455 |
| C106 | 7.924772683  | 5.695651301  | 5.165752923 |
| C107 | 8.628741254  | 5.800638801  | 6.395500733 |
| C108 | 5.794074349  | 5.839684993  | 6.395541657 |
| C109 | 10.627542164 | 6.552655957  | 5.165699758 |
| C110 | 9.992101353  | 6.233787744  | 6.395479648 |
| C111 | 13.483675305 | 9.661174485  | 5.165606470 |
| C112 | 11.792515945 | 7.384340046  | 5.165670046 |
| C113 | 12.298944327 | 7.883207555  | 6.395423540 |
| C114 | 13.951508808 | 11.012268070 | 5.165568642 |
| C115 | 14.079399096 | 11.712459030 | 6.394915417 |
| C116 | 13.150826373 | 9.032865212  | 6.395386739 |
| C117 | 14.019046653 | 13.848751678 | 5.165432181 |
| C118 | 14.113490004 | 13.141932666 | 6.394458310 |
| C119 | 13.618089446 | 15.222748191 | 5.165354331 |
| C120 | 13.319583570 | 15.868635418 | 6.394099628 |
| C121 | 12.059784304 | 17.582183894 | 7.630270706 |
| C122 | 10.961418558 | 18.489170097 | 7.642205018 |
| C123 | 10.319670986 | 18.809715778 | 8.865334805 |
| C124 | 12.538800827 | 17.049337120 | 8.856036293 |
| C125 | 8.256265854  | 19.437517735 | 7.663804844 |
| C126 | 8.968943694  | 19.292241443 | 8.873058943 |
| C127 | 4.133080590  | 18.472549254 | 7.626706827 |
| C128 | 6.821780532  | 19.388821663 | 7.636938623 |
| C129 | 6.117104231  | 19.260104290 | 8.859560407 |
| C130 | 2.968733852  | 17.641938756 | 7.625976900 |
| C131 | 2.458579885  | 17.146451613 | 8.855219046 |

|      |              |              |             |
|------|--------------|--------------|-------------|
| C132 | 4.764368121  | 18.799264240 | 8.856440250 |
| C133 | 1.249728677  | 15.385873491 | 7.625447671 |
| C134 | 1.592727553  | 16.008401942 | 8.855245869 |
| C135 | 0.657423115  | 11.209891887 | 7.625421799 |
| C136 | 0.758384501  | 14.043065144 | 7.625411032 |
| C137 | 0.620786967  | 13.345292524 | 8.855221093 |
| C138 | 1.058866368  | 9.836066367  | 7.625403522 |
| C139 | 1.365012636  | 9.194573997  | 8.855149381 |
| C140 | 0.570124838  | 11.915851737 | 8.855197134 |
| C141 | 2.673625308  | 7.506022603  | 7.625360925 |
| C142 | 2.179593937  | 8.017280273  | 8.855123909 |
| C143 | 6.494738640  | 5.715320757  | 7.625285191 |
| C144 | 3.816166468  | 6.644851520  | 7.625331974 |
| C145 | 4.443034368  | 6.308711613  | 8.855073562 |
| C146 | 7.924759994  | 5.695672632  | 7.625259473 |
| C147 | 8.628722794  | 5.800688683  | 8.855001656 |
| C148 | 5.794060292  | 5.839683091  | 8.855042869 |
| C149 | 10.627541342 | 6.552763644  | 7.625231556 |
| C150 | 9.992071841  | 6.233889680  | 8.854982299 |
| C151 | 13.484176297 | 9.661294788  | 7.625015814 |
| C152 | 11.792534898 | 7.384470376  | 7.625226492 |
| C153 | 12.299035973 | 7.883447199  | 8.854930606 |
| C154 | 13.952938867 | 11.012209837 | 7.624851788 |
| C155 | 14.082290525 | 11.711822259 | 8.854459552 |
| C156 | 13.151224409 | 9.033032644  | 8.854900852 |
| C157 | 14.024818698 | 13.847364286 | 7.623871817 |
| C158 | 14.119295465 | 13.141212357 | 8.854066807 |
| C159 | 13.625489788 | 15.220988045 | 7.622955280 |
| C160 | 13.331187440 | 15.862212445 | 8.854821246 |
| Ir1  | -6.509205725 | -4.831548004 | 3.404418247 |
| Ir2  | -5.097524240 | -3.048308930 | 4.540093661 |
| Ir3  | -4.139126108 | -5.371936019 | 4.148159892 |
| Ir4  | -5.969058932 | -5.012252047 | 5.864933119 |

(7, 0)-Ir<sub>4</sub>-CO

|    |             |              |             |
|----|-------------|--------------|-------------|
| C1 | 9.113014651 | 14.543459422 | 0.246847917 |
| C2 | 9.112938313 | 14.555029370 | 1.664804409 |
| C3 | 8.068760554 | 15.247486638 | 2.371782579 |
| C4 | 6.835447496 | 15.386077487 | 0.244063057 |
| C5 | 6.834164271 | 15.386884834 | 1.655061821 |
| C6 | 5.661325952 | 14.968958102 | 2.367778057 |
| C7 | 8.064778671 | 15.281165903 | 3.787917435 |
| C8 | 4.785485169 | 14.082687640 | 0.244509609 |
| C9 | 4.791387795 | 14.074985549 | 1.661268059 |

|     |             |              |             |
|-----|-------------|--------------|-------------|
| C10 | 4.381255516 | 12.897995877 | 2.369501756 |
| C11 | 5.665385223 | 14.977917800 | 3.781794453 |
| C12 | 4.487726512 | 11.669120636 | 0.238134604 |
| C13 | 4.485969916 | 11.661057464 | 1.657081737 |
| C14 | 5.120271035 | 10.585603650 | 2.368965690 |
| C15 | 4.388372509 | 12.895990628 | 3.786761983 |
| C16 | 6.167362476 | 9.914367135  | 0.237932659 |
| C17 | 6.165732901 | 9.910391354  | 1.657017074 |
| C18 | 7.401003449 | 9.757817579  | 2.372270209 |
| C19 | 5.120153473 | 10.580826011 | 3.790451540 |
| C20 | 8.578621742 | 10.179322815 | 0.246417004 |
| C21 | 8.576635910 | 10.176159878 | 1.663778459 |
| C22 | 9.444937762 | 11.065739716 | 2.376992976 |
| C23 | 7.400658810 | 9.756216013  | 3.788633377 |
| C24 | 9.873960205 | 12.235343211 | 0.249913153 |
| C25 | 9.858139752 | 12.241622307 | 1.667487508 |
| C26 | 9.739086495 | 13.481087120 | 2.377405677 |
| C27 | 9.443586788 | 11.065340782 | 3.793755328 |
| C28 | 9.719330900 | 13.483640778 | 3.795890662 |
| C29 | 9.100155274 | 14.568305567 | 4.505602507 |
| C30 | 9.116830463 | 14.577353570 | 5.916680350 |
| C31 | 8.108837701 | 15.345808671 | 6.618191239 |
| C32 | 6.823169076 | 15.453705813 | 4.480440858 |
| C33 | 6.801972764 | 15.544699249 | 5.921536910 |
| C34 | 5.608691708 | 15.007662277 | 6.601971147 |
| C35 | 8.107054401 | 15.333431096 | 8.065570896 |
| C36 | 4.793825568 | 14.072140590 | 4.490528735 |
| C37 | 4.788522450 | 14.064972709 | 5.898117802 |
| C38 | 4.415814916 | 12.901963390 | 6.625838484 |
| C39 | 5.597575236 | 15.081163030 | 8.024968931 |
| C40 | 4.490823482 | 11.655459124 | 4.502432166 |
| C41 | 4.502477862 | 11.658475987 | 5.921356080 |
| C42 | 5.138328724 | 10.590480771 | 6.636159035 |
| C43 | 4.409152145 | 12.936953623 | 8.049895316 |
| C44 | 6.165177394 | 9.899470175  | 4.503397931 |
| C45 | 6.171014392 | 9.898375855  | 5.923220573 |
| C46 | 7.409292978 | 9.733133416  | 6.634936671 |
| C47 | 5.161681301 | 10.624134384 | 8.054473833 |
| C48 | 8.573720852 | 10.172438277 | 4.502156222 |
| C49 | 8.578088316 | 10.160748842 | 5.920970585 |
| C50 | 9.433342485 | 11.061666095 | 6.631990701 |
| C51 | 7.417882963 | 9.735431967  | 8.052578443 |
| C52 | 9.841228169 | 12.245844110 | 4.505964382 |
| C53 | 9.820686163 | 12.246227057 | 5.921699648 |

|     |             |              |              |
|-----|-------------|--------------|--------------|
| C54 | 9.698234918 | 13.480072443 | 6.633425465  |
| C55 | 9.450848873 | 11.050208265 | 8.049033681  |
| C56 | 9.695366952 | 13.467049947 | 8.055766386  |
| C57 | 9.108758426 | 14.550904951 | 8.782096556  |
| C58 | 9.108700194 | 14.542407307 | 10.197497218 |
| C59 | 8.073087768 | 15.229619253 | 10.925227278 |
| C60 | 6.814194999 | 15.506241652 | 8.777399713  |
| C61 | 6.833918629 | 15.531077749 | 10.227326471 |
| C62 | 5.620421427 | 15.077079965 | 10.912292948 |
| C63 | 8.066131778 | 15.214059664 | 12.327502881 |
| C64 | 4.770176787 | 14.136022935 | 8.755541422  |
| C65 | 4.763714453 | 14.158708991 | 10.179038445 |
| C66 | 4.430303361 | 12.958051530 | 10.885654217 |
| C67 | 5.628642643 | 15.049281574 | 12.332733903 |
| C68 | 4.527139436 | 11.699346647 | 8.762560463  |
| C69 | 4.566672359 | 11.720029944 | 10.174136907 |
| C70 | 5.162450179 | 10.629046290 | 10.889769437 |
| C71 | 4.408026351 | 12.945913905 | 12.306023009 |
| C72 | 6.189957856 | 9.924934893  | 8.767717899  |
| C73 | 6.190956850 | 9.924425640  | 10.184238901 |
| C74 | 7.424125247 | 9.753523660  | 10.898245991 |
| C75 | 5.159141342 | 10.634057856 | 12.306097508 |
| C76 | 8.596573222 | 10.148859798 | 8.762383066  |
| C77 | 8.604190948 | 10.148414546 | 10.183672745 |
| C78 | 9.477814933 | 11.038970122 | 10.893137767 |
| C79 | 7.421114759 | 9.757599148  | 12.314371162 |
| C80 | 9.844489934 | 12.231552078 | 8.762006804  |
| C81 | 9.852541469 | 12.225805780 | 10.181264764 |
| C82 | 9.729717762 | 13.458131382 | 10.900996736 |
| C83 | 9.472210664 | 11.048283125 | 12.313708027 |
| C84 | 9.758924062 | 13.461518818 | 12.319741579 |
| C85 | 9.104228948 | 14.519319090 | 13.035107884 |
| C86 | 9.113567259 | 14.530584687 | 14.449719731 |
| C87 | 8.070768336 | 15.217714542 | 15.161017074 |
| C88 | 6.828566305 | 15.412414423 | 13.041923047 |
| C89 | 6.833485691 | 15.385454564 | 14.451003217 |
| C90 | 5.650617504 | 14.988616008 | 15.162940214 |
| C91 | 8.072962914 | 15.228990480 | 16.572923129 |
| C92 | 4.784585356 | 14.122890742 | 13.030802027 |
| C93 | 4.775055830 | 14.108219431 | 14.449520787 |
| C94 | 4.378814444 | 12.922182158 | 15.151841995 |
| C95 | 5.657033337 | 14.974562206 | 16.576291100 |
| C96 | 4.513176001 | 11.702186400 | 13.013738916 |
| C97 | 4.501561420 | 11.689219051 | 14.432822710 |

|      |              |              |              |
|------|--------------|--------------|--------------|
| C98  | 5.130141457  | 10.610323898 | 15.144231907 |
| C99  | 4.371421750  | 12.911989610 | 16.570406903 |
| C100 | 6.185684482  | 9.933894789  | 13.021617734 |
| C101 | 6.179018214  | 9.932720871  | 14.438198836 |
| C102 | 7.410399523  | 9.770446686  | 15.154440723 |
| C103 | 5.128270567  | 10.603266492 | 16.564210581 |
| C104 | 8.597623989  | 10.164863744 | 13.027765376 |
| C105 | 8.592846558  | 10.169789936 | 14.446217249 |
| C106 | 9.468539669  | 11.054138328 | 15.159262564 |
| C107 | 7.405807923  | 9.766655302  | 16.571007846 |
| C108 | 9.885640974  | 12.224129598 | 13.027762192 |
| C109 | 9.882921503  | 12.227221744 | 14.447277500 |
| C110 | 9.759017104  | 13.466721795 | 15.159050168 |
| C111 | 9.461071618  | 11.059631221 | 16.577694703 |
| C112 | 9.755121742  | 13.471900184 | 16.578277428 |
| Ir1  | -9.157435164 | -9.037547712 | 6.956835640  |
| Ir2  | -8.348712004 | -6.785358455 | 7.826761290  |
| Ir3  | -6.714617846 | -8.723881767 | 7.649366949  |
| Ir4  | -8.575355881 | -8.747719442 | 9.441490128  |
| C    | 6.875926040  | 21.156101372 | 8.788726233  |
| O    | 7.333542892  | 21.539343195 | 9.790067303  |

(8, 0)-Ir<sub>4</sub>-CO

|     |             |              |             |
|-----|-------------|--------------|-------------|
| C1  | 9.737741784 | 14.535572210 | 1.979174910 |
| C2  | 9.835081855 | 14.614274332 | 3.411533539 |
| C3  | 8.765916355 | 15.364504097 | 4.093303636 |
| C4  | 8.744742861 | 15.293560557 | 1.273758128 |
| C5  | 7.525233863 | 15.592054193 | 1.985657650 |
| C6  | 7.518763602 | 15.584786519 | 3.386676421 |
| C7  | 6.315485856 | 15.320878993 | 4.120924916 |
| C8  | 6.299682421 | 15.363391011 | 1.278795045 |
| C9  | 5.269331351 | 14.671125601 | 1.995819354 |
| C10 | 5.207699277 | 14.743099660 | 3.413213185 |
| C11 | 4.526223995 | 13.701813700 | 4.115694390 |
| C12 | 4.498068539 | 13.701412195 | 1.277176973 |
| C13 | 4.109823188 | 12.518890432 | 1.983530044 |
| C14 | 4.228185635 | 12.501969557 | 3.399608176 |
| C15 | 4.253853237 | 11.259915771 | 4.116011451 |
| C16 | 4.278256405 | 11.289385082 | 1.276857430 |
| C17 | 4.867060357 | 10.196476661 | 1.994022230 |
| C18 | 4.772347686 | 10.122509280 | 3.414558116 |
| C19 | 5.795461385 | 9.404487459  | 4.117482939 |
| C20 | 5.803870022 | 9.377551451  | 1.279236026 |
| C21 | 7.002234490 | 9.027022813  | 1.983912424 |



|     |              |              |              |
|-----|--------------|--------------|--------------|
| C22 | 7.008375663  | 9.148344491  | 3.398385374  |
| C23 | 8.237011580  | 9.304320827  | 4.117823464  |
| C24 | 8.214050414  | 9.318237974  | 1.282625551  |
| C25 | 9.209783530  | 10.052049303 | 2.003450427  |
| C26 | 9.325153000  | 9.917516697  | 3.412612256  |
| C27 | 9.988351477  | 10.970981403 | 4.113617732  |
| C28 | 9.984886938  | 11.019715729 | 1.284342042  |
| C29 | 10.461357942 | 12.170420521 | 1.992504299  |
| C30 | 10.206763015 | 12.186847197 | 3.392291737  |
| C31 | 10.263575994 | 13.414797485 | 4.120004404  |
| C32 | 10.291768412 | 13.411097747 | 1.276132170  |
| C33 | 9.739968577  | 14.557483512 | 6.246573178  |
| C34 | 9.794244087  | 14.591823108 | 7.687620755  |
| C35 | 8.757958689  | 15.341546332 | 8.394317406  |
| C36 | 8.770742521  | 15.390724923 | 5.529257852  |
| C37 | 7.538784028  | 15.807366778 | 6.231575645  |
| C38 | 7.533172910  | 15.651940328 | 7.693718424  |
| C39 | 6.309059251  | 15.368024082 | 8.399713497  |
| C40 | 6.255615189  | 15.514496578 | 5.534078037  |
| C41 | 5.393796297  | 14.607404915 | 6.254326700  |
| C42 | 5.251111297  | 14.728306331 | 7.660313077  |
| C43 | 4.462612072  | 13.758146055 | 8.363169124  |
| C44 | 4.595116982  | 13.668057748 | 5.533951527  |
| C45 | 4.144082395  | 12.514875461 | 6.240656269  |
| C46 | 4.225549364  | 12.528734979 | 7.659654951  |
| C47 | 4.342714634  | 11.298151952 | 8.381466868  |
| C48 | 4.247659682  | 11.267904673 | 5.541333457  |
| C49 | 4.854606855  | 10.183201174 | 6.252791122  |
| C50 | 4.845752172  | 10.164243561 | 7.672627803  |
| C51 | 5.793393075  | 9.352698627  | 8.375553998  |
| C52 | 5.811228418  | 9.398075791  | 5.535260491  |
| C53 | 7.010306050  | 9.052494031  | 6.244555628  |
| C54 | 7.011244463  | 9.085941624  | 7.666108056  |
| C55 | 8.232021325  | 9.313787769  | 8.383735090  |
| C56 | 8.240245982  | 9.261835914  | 5.540559073  |
| C57 | 9.247078537  | 9.987211269  | 6.254095746  |
| C58 | 9.305527583  | 9.937285365  | 7.671924537  |
| C59 | 10.023772119 | 10.957474243 | 8.374495095  |
| C60 | 9.976064320  | 10.984726070 | 5.533853166  |
| C61 | 10.380596577 | 12.159142456 | 6.239870488  |
| C62 | 10.259598127 | 12.174610432 | 7.661384774  |
| C63 | 10.277932741 | 13.411685228 | 8.381276586  |
| C64 | 10.229071576 | 13.388561652 | 5.528680466  |
| C65 | 9.736902546  | 14.531733390 | 10.508223727 |

|     |              |              |              |
|-----|--------------|--------------|--------------|
| C66 | 9.711392301  | 14.506560692 | 11.924589272 |
| C67 | 8.732874685  | 15.274934793 | 12.640834643 |
| C68 | 8.728295960  | 15.273629668 | 9.808873972  |
| C69 | 7.516894062  | 15.563817141 | 10.527392799 |
| C70 | 7.522242252  | 15.582187365 | 11.934876242 |
| C71 | 6.295799035  | 15.369839767 | 12.647025951 |
| C72 | 6.273656744  | 15.447406824 | 9.811905190  |
| C73 | 5.218174021  | 14.763481878 | 10.505543925 |
| C74 | 5.243916643  | 14.709630404 | 11.927167897 |
| C75 | 4.476491656  | 13.724741003 | 12.633023085 |
| C76 | 4.594142607  | 13.697639455 | 9.783180987  |
| C77 | 4.218914223  | 12.518504133 | 10.502903258 |
| C78 | 4.150917775  | 12.527146925 | 11.921986422 |
| C79 | 4.291906486  | 11.294743833 | 12.636687010 |
| C80 | 4.265743105  | 11.276201434 | 9.798222008  |
| C81 | 4.832944851  | 10.169174433 | 10.505290074 |
| C82 | 4.855951680  | 10.187352806 | 11.927069313 |
| C83 | 5.806409933  | 9.384278522  | 12.637965271 |
| C84 | 5.814562540  | 9.400849366  | 9.795662124  |
| C85 | 7.019677675  | 9.098947424  | 10.511500057 |
| C86 | 7.014139182  | 9.074006865  | 11.930364004 |
| C87 | 8.232677789  | 9.303952948  | 12.642712978 |
| C88 | 8.249340050  | 9.281912883  | 9.803560274  |
| C89 | 9.307933847  | 9.942478202  | 10.510628266 |
| C90 | 9.275451169  | 9.986016302  | 11.932761282 |
| C91 | 10.017023247 | 10.986575525 | 12.642813186 |
| C92 | 9.999500323  | 10.972650397 | 9.796599122  |
| C93 | 10.329319024 | 12.169656398 | 10.507794155 |
| C94 | 10.384341487 | 12.166982659 | 11.926400997 |
| C95 | 10.297331184 | 13.407348640 | 12.635983552 |
| C96 | 10.298643547 | 13.413280636 | 9.795673054  |
| Ir1 | -3.982890794 | -7.494863872 | 5.643709274  |
| Ir2 | -4.254671235 | -9.753627359 | 6.776828291  |
| Ir3 | -4.660763062 | -9.509216300 | 4.262084472  |
| Ir4 | -6.303704575 | -8.523579826 | 5.939237924  |
| C   | 12.123708248 | 20.143271404 | 6.525173796  |
| O   | 12.495065257 | 20.440388091 | 7.577242197  |

(10, 0)-Ir<sub>4</sub>-CO

|    |              |              |             |
|----|--------------|--------------|-------------|
| C1 | 10.710522138 | 15.109361146 | 1.332186627 |
| C2 | 10.708169640 | 15.112827722 | 2.749635708 |
| C3 | 9.804745500  | 15.967668065 | 3.447586048 |
| C4 | 9.804024833  | 15.955082223 | 0.626205406 |
| C5 | 8.674518163  | 16.472393744 | 1.330315267 |

|     |              |              |             |
|-----|--------------|--------------|-------------|
| C6  | 8.675564083  | 16.481709593 | 2.742309150 |
| C7  | 7.442674671  | 16.610966554 | 3.453678066 |
| C8  | 7.439926039  | 16.596960921 | 0.626715723 |
| C9  | 6.231869937  | 16.320267466 | 1.335673466 |
| C10 | 6.234171241  | 16.322071331 | 2.751639478 |
| C11 | 5.179581972  | 15.675341603 | 3.462953174 |
| C12 | 5.171064145  | 15.678709910 | 0.630223328 |
| C13 | 4.354708607  | 14.749385796 | 1.337594859 |
| C14 | 4.359598377  | 14.747422292 | 2.758745022 |
| C15 | 3.855432083  | 13.615708565 | 3.467099689 |
| C16 | 3.849924537  | 13.619207360 | 0.628688368 |
| C17 | 3.709647319  | 12.389257734 | 1.336755686 |
| C18 | 3.710744471  | 12.387634660 | 2.758394917 |
| C19 | 3.948310887  | 11.171750519 | 3.467276826 |
| C20 | 3.948217496  | 11.174662521 | 0.627726539 |
| C21 | 4.554046009  | 10.092817620 | 1.336505557 |
| C22 | 4.553915346  | 10.090723223 | 2.758410533 |
| C23 | 5.467491474  | 9.254733927  | 3.466689891 |
| C24 | 5.468268903  | 9.257560420  | 0.629036915 |
| C25 | 6.597653448  | 8.748181695  | 1.337497925 |
| C26 | 6.597760662  | 8.746635664  | 2.759140937 |
| C27 | 7.829393780  | 8.617310565  | 3.468162317 |
| C28 | 7.829789597  | 8.619322419  | 0.629426199 |
| C29 | 9.039372433  | 8.883735169  | 1.338500603 |
| C30 | 9.039698218  | 8.883359410  | 2.759819253 |
| C31 | 10.103363283 | 9.518978622  | 3.468760235 |
| C32 | 10.104250583 | 9.518464071  | 0.630254937 |
| C33 | 10.920991748 | 10.448018576 | 1.338350902 |
| C34 | 10.920063219 | 10.449957563 | 2.760937837 |
| C35 | 11.412839838 | 11.585016819 | 3.468308492 |
| C36 | 11.418999762 | 11.580789462 | 0.629955799 |
| C37 | 11.552012779 | 12.811575070 | 1.337927846 |
| C38 | 11.547583081 | 12.814698040 | 2.758024058 |
| C39 | 11.300919690 | 14.029535424 | 3.462364967 |
| C40 | 11.310869948 | 14.024981177 | 0.628127587 |
| C41 | 10.694884455 | 15.121670145 | 5.580383470 |
| C42 | 10.691151977 | 15.121398997 | 7.002482336 |
| C43 | 9.849128141  | 16.034608821 | 7.697014029 |
| C44 | 9.808627557  | 15.990660136 | 4.861227192 |
| C45 | 8.696526861  | 16.555375351 | 5.552733996 |
| C46 | 8.754157330  | 16.684220713 | 6.978943879 |
| C47 | 7.398194940  | 16.765880836 | 7.722657249 |
| C48 | 7.447606923  | 16.640560812 | 4.866457381 |
| C49 | 6.231194877  | 16.345588500 | 5.586322946 |

|     |              |              |              |
|-----|--------------|--------------|--------------|
| C50 | 6.214853714  | 16.350722354 | 7.000891689  |
| C51 | 5.192422593  | 15.670981875 | 7.716721597  |
| C52 | 5.185464428  | 15.676636125 | 4.883790383  |
| C53 | 4.369504027  | 14.744583489 | 5.594323006  |
| C54 | 4.373703371  | 14.740739732 | 7.014922876  |
| C55 | 3.864101308  | 13.613658199 | 7.725252414  |
| C56 | 3.858761312  | 13.614694936 | 4.887969824  |
| C57 | 3.713503666  | 12.386182858 | 5.596851857  |
| C58 | 3.714066035  | 12.385363368 | 7.018315227  |
| C59 | 3.948219401  | 11.169409676 | 7.727747103  |
| C60 | 3.948302195  | 11.170211513 | 4.888152150  |
| C61 | 4.553065512  | 10.088187098 | 5.597204805  |
| C62 | 4.553088606  | 10.087035385 | 7.019115516  |
| C63 | 5.467316328  | 9.251802589  | 7.727287613  |
| C64 | 5.467443281  | 9.253070619  | 4.889262717  |
| C65 | 6.597313563  | 8.743976704  | 5.597753072  |
| C66 | 6.597614686  | 8.742870435  | 7.019283107  |
| C67 | 7.829740315  | 8.612852679  | 7.728103492  |
| C68 | 7.829794530  | 8.615732294  | 4.889247942  |
| C69 | 9.039946817  | 8.879948357  | 5.598341373  |
| C70 | 9.040655514  | 8.877923509  | 7.019360609  |
| C71 | 10.105596210 | 9.513289490  | 7.728335453  |
| C72 | 10.104126227 | 9.518009562  | 4.890203333  |
| C73 | 10.918179383 | 10.450181776 | 5.598354331  |
| C74 | 10.919651115 | 10.448707114 | 7.020655060  |
| C75 | 11.407637407 | 11.585960309 | 7.728220867  |
| C76 | 11.409157695 | 11.588096625 | 4.890613922  |
| C77 | 11.532192052 | 12.819976509 | 5.597376729  |
| C78 | 11.528924451 | 12.821290299 | 7.019107558  |
| C79 | 11.281056284 | 14.033575326 | 7.724399563  |
| C80 | 11.289699811 | 14.034162417 | 4.883383651  |
| C81 | 10.735644461 | 15.119785150 | 9.874603751  |
| C82 | 10.720098952 | 15.122553357 | 11.294491655 |
| C83 | 9.834680621  | 16.000884502 | 12.017949687 |
| C84 | 9.909253349  | 16.064892272 | 9.176691933  |
| C85 | 8.736847793  | 16.594071315 | 9.858838371  |
| C86 | 8.709705544  | 16.596533074 | 11.353910794 |
| C87 | 7.448850274  | 16.663243419 | 12.030508226 |
| C88 | 7.421701090  | 16.684569476 | 9.160757014  |
| C89 | 6.243214189  | 16.325217270 | 9.860225303  |
| C90 | 6.251303839  | 16.335727968 | 11.292988811 |
| C91 | 5.194941656  | 15.682714924 | 11.990483768 |
| C92 | 5.193765099  | 15.671720085 | 9.144277331  |
| C93 | 4.377667576  | 14.745575953 | 9.853576075  |

|      |              |              |              |
|------|--------------|--------------|--------------|
| C94  | 4.377813550  | 14.749831547 | 11.277873725 |
| C95  | 3.865234662  | 13.622316118 | 11.984955475 |
| C96  | 3.864195621  | 13.615321460 | 9.147404592  |
| C97  | 3.715588896  | 12.388367251 | 9.856438913  |
| C98  | 3.717010241  | 12.391131876 | 11.277687859 |
| C99  | 3.951332440  | 11.175412978 | 11.986884363 |
| C100 | 3.948703181  | 11.170291696 | 9.148436731  |
| C101 | 4.553729310  | 10.088852372 | 9.857482188  |
| C102 | 4.554592140  | 10.090917556 | 11.279022109 |
| C103 | 5.468301816  | 9.255407513  | 11.987169087 |
| C104 | 5.467717951  | 9.252118942  | 9.149712328  |
| C105 | 6.597628437  | 8.743196056  | 9.857926744  |
| C106 | 6.597880312  | 8.744374124  | 11.279390689 |
| C107 | 7.829624814  | 8.614757769  | 11.988232944 |
| C108 | 7.830112961  | 8.612517907  | 9.149204307  |
| C109 | 9.040644252  | 8.876190634  | 9.858030616  |
| C110 | 9.040561596  | 8.877509693  | 11.279331163 |
| C111 | 10.104670103 | 9.513303575  | 11.988199887 |
| C112 | 10.106029331 | 9.512124935  | 9.149315826  |
| C113 | 10.919879931 | 10.445463901 | 9.857344887  |
| C114 | 10.920096327 | 10.445380062 | 11.279931380 |
| C115 | 11.411624988 | 11.580490079 | 11.988330184 |
| C116 | 11.407596904 | 11.584591202 | 9.150049967  |
| C117 | 11.532917189 | 12.815080474 | 9.859436080  |
| C118 | 11.537128575 | 12.812816096 | 11.280744770 |
| C119 | 11.294394908 | 14.025161415 | 11.994779080 |
| C120 | 11.288834546 | 14.031922730 | 9.152669510  |
| C121 | 10.712881460 | 15.111712741 | 14.127557051 |
| C122 | 10.712219216 | 15.109814427 | 15.544669917 |
| C123 | 9.806056636  | 15.956794438 | 16.252043874 |
| C124 | 9.818952239  | 15.977980970 | 13.428139671 |
| C125 | 8.682126071  | 16.497137937 | 14.139095834 |
| C126 | 8.678032216  | 16.479573567 | 15.549238867 |
| C127 | 7.440522003  | 16.599841889 | 16.254734996 |
| C128 | 7.442742297  | 16.631149643 | 13.436818029 |
| C129 | 6.234755435  | 16.332453687 | 14.132087440 |
| C130 | 6.231663486  | 16.324790693 | 15.547517927 |
| C131 | 5.171109400  | 15.681328147 | 16.250647583 |
| C132 | 5.181618119  | 15.686817379 | 13.414545382 |
| C133 | 4.360262274  | 14.756231314 | 14.117377306 |
| C134 | 4.354187624  | 14.754284773 | 15.539701404 |
| C135 | 3.850064423  | 13.621485187 | 16.246590599 |
| C136 | 3.859120716  | 13.622942838 | 13.407796447 |
| C137 | 3.713081478  | 12.393649981 | 14.115672752 |

|      |              |              |              |
|------|--------------|--------------|--------------|
| C138 | 3.710328119  | 12.392185032 | 15.537570729 |
| C139 | 3.948657456  | 11.176249708 | 16.246368593 |
| C140 | 3.951280891  | 11.176551814 | 13.407718264 |
| C141 | 4.555249564  | 10.094675459 | 14.116591145 |
| C142 | 4.555049883  | 10.094630324 | 15.538428977 |
| C143 | 5.468255466  | 9.258491092  | 16.246532544 |
| C144 | 5.468710053  | 9.257114424  | 13.409394050 |
| C145 | 6.597854679  | 8.747881146  | 14.117725186 |
| C146 | 6.598008440  | 8.748683866  | 15.539266262 |
| C147 | 7.829336236  | 8.619211495  | 16.248255084 |
| C148 | 7.829779611  | 8.616601663  | 13.409403868 |
| C149 | 9.039451530  | 8.880885370  | 14.118490523 |
| C150 | 9.039612678  | 8.882507653  | 15.539750030 |
| C151 | 10.103926043 | 9.517436048  | 16.248685108 |
| C152 | 10.104523647 | 9.514683445  | 13.409615594 |
| C153 | 10.920394364 | 10.445293985 | 14.117948499 |
| C154 | 10.921270103 | 10.446186354 | 15.540423833 |
| C155 | 11.418775102 | 11.579430630 | 16.248461968 |
| C156 | 11.414318225 | 11.579612599 | 13.410072394 |
| C157 | 11.546444115 | 12.809864648 | 14.120203677 |
| C158 | 11.551276923 | 12.809745843 | 15.539892557 |
| C159 | 11.310728859 | 14.023867184 | 16.248895119 |
| C160 | 11.301462508 | 14.024601665 | 13.415720166 |
| Ir1  | -5.297942047 | -6.069366035 | 8.818583490  |
| Ir2  | -4.498921477 | -8.491016357 | 8.433117440  |
| Ir3  | -6.800621899 | -7.761686977 | 7.606166652  |
| Ir4  | -6.377366251 | -7.956988548 | 10.091525738 |
| O    | 10.433975299 | 21.903469800 | 7.062618270  |
| C    | 10.231231759 | 21.360668676 | 8.076418028  |

(7, 7)-Ir<sub>4</sub>-CO

|     |              |              |             |
|-----|--------------|--------------|-------------|
| C1  | 11.590329419 | 14.753524059 | 0.463910784 |
| C2  | 7.963404381  | 16.774878731 | 0.455830018 |
| C3  | 10.615724438 | 15.802901283 | 0.461147722 |
| C4  | 10.033057299 | 16.213530702 | 1.685983661 |
| C5  | 6.539332156  | 16.571371949 | 0.463675623 |
| C6  | 5.870632261  | 16.298716652 | 1.688640998 |
| C7  | 8.690643289  | 16.713531920 | 1.668705291 |
| C8  | 4.201514112  | 14.963843430 | 0.467776667 |
| C9  | 4.690708236  | 15.480894294 | 1.694500271 |
| C10 | 3.087413536  | 10.942104317 | 0.466605667 |
| C11 | 3.446319269  | 13.745213205 | 0.466748702 |
| C12 | 3.203197767  | 13.072662170 | 1.695632057 |
| C13 | 3.533864534  | 9.581402350  | 0.466687353 |

|     |              |              |             |
|-----|--------------|--------------|-------------|
| C14 | 3.901011575  | 8.970562701  | 1.696535042 |
| C15 | 3.020975488  | 11.652299696 | 1.696048228 |
| C16 | 5.500943218  | 7.561022655  | 0.466624327 |
| C17 | 4.898761934  | 7.943224126  | 1.696399435 |
| C18 | 9.650347633  | 7.444681434  | 0.466118536 |
| C19 | 6.852591822  | 7.088117898  | 0.466432442 |
| C20 | 7.561666933  | 7.013837001  | 1.696118704 |
| C21 | 10.846226988 | 8.233727194  | 0.465926338 |
| C22 | 11.341554198 | 8.745093364  | 1.695643781 |
| C23 | 8.982539965  | 7.195264546  | 1.695916985 |
| C24 | 12.315565051 | 10.644442075 | 0.466329464 |
| C25 | 12.084388777 | 9.969303865  | 1.695436349 |
| C26 | 12.477428083 | 12.067855896 | 0.466489473 |
| C27 | 12.396291935 | 12.777985509 | 1.695204315 |
| C28 | 11.946483384 | 14.138639866 | 1.694786154 |
| C29 | 11.582713737 | 14.753070594 | 2.925592697 |
| C30 | 7.969795065  | 16.833866056 | 2.894984303 |
| C31 | 10.629214045 | 15.819617710 | 2.927403967 |
| C32 | 10.085408106 | 16.269918203 | 4.160690505 |
| C33 | 6.531528999  | 16.575805370 | 2.915479833 |
| C34 | 5.868642246  | 16.290056160 | 4.151760092 |
| C35 | 8.733105810  | 16.853436642 | 4.147777485 |
| C36 | 4.195966207  | 14.959871724 | 2.924460640 |
| C37 | 4.686187142  | 15.464302339 | 4.154164923 |
| C38 | 3.085116727  | 10.942462158 | 2.925985775 |
| C39 | 3.440968473  | 13.743448243 | 2.925276329 |
| C40 | 3.199054258  | 13.072378090 | 4.155577647 |
| C41 | 3.532815994  | 9.581963032  | 2.926103573 |
| C42 | 3.900643844  | 8.970948996  | 4.155901846 |
| C43 | 3.017952796  | 11.652102414 | 4.155910598 |
| C44 | 5.501012909  | 7.561325563  | 2.926119969 |
| C45 | 4.898701540  | 7.943739554  | 4.155803493 |
| C46 | 9.650648054  | 7.443916046  | 2.925656859 |
| C47 | 6.852616786  | 7.088221528  | 2.925944769 |
| C48 | 7.561823988  | 7.014169321  | 4.155685916 |
| C49 | 10.846357625 | 8.232982704  | 2.925465724 |
| C50 | 11.341763928 | 8.745159840  | 4.155204619 |
| C51 | 8.982629070  | 7.195470097  | 4.155603417 |
| C52 | 12.310927655 | 10.644774800 | 2.924725369 |
| C53 | 12.083799251 | 9.969585971  | 4.154827878 |
| C54 | 12.468063663 | 12.067792621 | 2.923796818 |
| C55 | 12.392570368 | 12.775457990 | 4.154332414 |
| C56 | 11.943487537 | 14.132666031 | 4.154280117 |
| C57 | 11.587397048 | 14.745654839 | 5.385277405 |

|      |              |              |             |
|------|--------------|--------------|-------------|
| C58  | 7.956765589  | 16.958212192 | 5.419138101 |
| C59  | 10.627435089 | 15.803242508 | 5.388249001 |
| C60  | 10.033470859 | 16.187627082 | 6.618697078 |
| C61  | 6.526766310  | 16.574543251 | 5.390871421 |
| C62  | 5.877569552  | 16.272440989 | 6.630703663 |
| C63  | 8.720987740  | 16.786393663 | 6.636956176 |
| C64  | 4.203005184  | 14.953446261 | 5.383990691 |
| C65  | 4.706193899  | 15.463668926 | 6.620566073 |
| C66  | 3.084560022  | 10.942051566 | 5.386067384 |
| C67  | 3.441690276  | 13.742316936 | 5.386188758 |
| C68  | 3.201910921  | 13.071909018 | 6.616606628 |
| C69  | 3.532779627  | 9.581977511  | 5.385760628 |
| C70  | 3.901060846  | 8.970649857  | 6.615372056 |
| C71  | 3.019654555  | 11.651683433 | 6.616043393 |
| C72  | 5.501057431  | 7.561525389  | 5.385450872 |
| C73  | 4.898772265  | 7.943554442  | 6.615241222 |
| C74  | 9.650750290  | 7.444710237  | 5.385381641 |
| C75  | 6.852596022  | 7.088562661  | 5.385412880 |
| C76  | 7.561762667  | 7.014372322  | 6.615120863 |
| C77  | 10.846688468 | 8.233475994  | 5.385350781 |
| C78  | 11.342588718 | 8.745702396  | 6.614908675 |
| C79  | 8.982524244  | 7.196078611  | 6.615074486 |
| C80  | 12.314558921 | 10.644093885 | 5.384718034 |
| C81  | 12.087941481 | 9.968925759  | 6.614814118 |
| C82  | 12.474318355 | 12.066686242 | 5.384403525 |
| C83  | 12.405221053 | 12.775233009 | 6.614734397 |
| C84  | 11.953127184 | 14.132143540 | 6.615093688 |
| C85  | 11.590630990 | 14.746090547 | 7.844460499 |
| C86  | 7.964801387  | 16.851697492 | 7.854860824 |
| C87  | 10.606245610 | 15.785097720 | 7.840913596 |
| C88  | 10.014746407 | 16.198151881 | 9.072638292 |
| C89  | 6.539457695  | 16.571985480 | 7.849404703 |
| C90  | 5.878721108  | 16.295488766 | 9.074082467 |
| C91  | 8.682010594  | 16.719549701 | 9.077504824 |
| C92  | 4.206117666  | 14.955343759 | 7.848977065 |
| C93  | 4.699646580  | 15.477590611 | 9.074822763 |
| C94  | 3.086876530  | 10.942014743 | 7.845718669 |
| C95  | 3.445696087  | 13.742706350 | 7.846847192 |
| C96  | 3.205581139  | 13.072662936 | 9.076144236 |
| C97  | 3.533788386  | 9.581596192  | 7.845334726 |
| C98  | 3.901467728  | 8.970501920  | 9.074954142 |
| C99  | 3.022163189  | 11.651614631 | 9.075499081 |
| C100 | 5.500980105  | 7.561177413  | 7.844935339 |
| C101 | 4.898942747  | 7.943036334  | 9.074810945 |



|      |              |              |             |
|------|--------------|--------------|-------------|
| C102 | 9.650500259  | 7.445331359  | 7.844715516 |
| C103 | 6.852584296  | 7.088398616  | 7.844834152 |
| C104 | 7.561579773  | 7.014290674  | 9.074573447 |
| C105 | 10.846624172 | 8.234266061  | 7.844602172 |
| C106 | 11.342076455 | 8.746042502  | 9.074455956 |
| C107 | 8.982390238  | 7.196193865  | 9.074403392 |
| C108 | 12.318977607 | 10.643540239 | 7.844747014 |
| C109 | 12.087600131 | 9.969166975  | 9.074572005 |
| C110 | 12.482689188 | 12.066640756 | 7.845273873 |
| C111 | 12.408211469 | 12.776509521 | 9.074590411 |
| C112 | 11.956462517 | 14.136489428 | 9.074239373 |
| Ir1  | -8.857427702 | -7.452799890 | 4.443087671 |
| Ir2  | -7.608732417 | -5.232529924 | 4.568076085 |
| Ir3  | -6.470473238 | -7.266728677 | 3.558838782 |
| Ir4  | -6.926720743 | -7.170770088 | 6.093003501 |
| C    | 7.902741629  | 22.665907041 | 5.461305440 |
| O    | 8.302520241  | 23.234425436 | 6.408990101 |

(8, 8)-Ir<sub>4</sub>-COC1 12.187380427 16.220662542 0.812333786

|     |              |              |             |
|-----|--------------|--------------|-------------|
| C2  | 11.075987796 | 17.132437342 | 0.812971209 |
| C3  | 10.450801602 | 17.489096733 | 2.032249475 |
| C4  | 12.635927286 | 15.666354751 | 2.043742996 |
| C5  | 8.333481478  | 17.753892838 | 0.813661806 |
| C6  | 9.051051054  | 17.805289914 | 2.032291585 |
| C7  | 4.640136210  | 15.742889364 | 0.810292430 |
| C8  | 6.936446607  | 17.412562489 | 0.812892855 |
| C9  | 6.292968406  | 17.106658708 | 2.043787489 |
| C10 | 3.829251622  | 14.559898309 | 0.807909575 |
| C11 | 3.531510680  | 13.911279320 | 2.036996941 |
| C12 | 5.136218455  | 16.257271729 | 2.040412708 |
| C13 | 3.136984936  | 11.808965878 | 0.805492695 |
| C14 | 3.183168711  | 12.520308375 | 2.035379442 |
| C15 | 4.706966347  | 7.929107765  | 0.802927556 |
| C16 | 3.311122242  | 10.386964746 | 0.804162165 |
| C17 | 3.531201331  | 9.709207441  | 2.033702977 |
| C18 | 5.854663027  | 7.072638610  | 0.802481780 |
| C19 | 6.499225378  | 6.772657837  | 2.032166610 |
| C20 | 4.234935501  | 8.462072067  | 2.032825636 |
| C21 | 8.605442521  | 6.445358508  | 0.802436366 |
| C22 | 7.895367087  | 6.455395192  | 2.032136187 |
| C23 | 12.339407638 | 8.328461370  | 0.803973304 |
| C24 | 10.010121395 | 6.723737721  | 0.802818685 |
| C25 | 10.663969419 | 7.004346224  | 2.032703460 |
| C26 | 13.128039631 | 9.525127953  | 0.805254867 |

|     |              |              |             |
|-----|--------------|--------------|-------------|
| C27 | 13.404325061 | 10.182786227 | 2.035112554 |
| C28 | 11.842893059 | 7.818318840  | 2.033520869 |
| C29 | 13.727031796 | 12.297139732 | 0.807578523 |
| C30 | 13.706280926 | 11.584250814 | 2.036658635 |
| C31 | 13.521851322 | 13.715959802 | 0.809959002 |
| C32 | 13.303232006 | 14.397028718 | 2.040173069 |
| C33 | 12.203690125 | 16.237734552 | 3.270557595 |
| C34 | 11.147397988 | 17.233699562 | 3.266549390 |
| C35 | 10.495019904 | 17.566640457 | 4.510044110 |
| C36 | 12.617033395 | 15.651615114 | 4.492522465 |
| C37 | 8.312327191  | 17.876810150 | 3.267799977 |
| C38 | 9.042258566  | 17.895570453 | 4.510939664 |
| C39 | 4.635594498  | 15.745005268 | 3.267837058 |
| C40 | 6.928850636  | 17.433061423 | 3.271006306 |
| C41 | 6.301186358  | 17.087826247 | 4.493316894 |
| C42 | 3.826047932  | 14.561767196 | 3.266729876 |
| C43 | 3.531509708  | 13.911380726 | 4.496629792 |
| C44 | 5.140057714  | 16.253386214 | 4.496261376 |
| C45 | 3.136689647  | 11.809318582 | 3.264880900 |
| C46 | 3.183566696  | 12.520842487 | 4.494912720 |
| C47 | 4.707127765  | 7.929178439  | 3.262412613 |
| C48 | 3.311168354  | 10.387305103 | 3.263632071 |
| C49 | 3.531174545  | 9.709091725  | 4.493061854 |
| C50 | 5.854696231  | 7.072723422  | 3.261971354 |
| C51 | 6.499355739  | 6.772685946  | 4.491699084 |
| C52 | 4.234940513  | 8.462280054  | 4.492277708 |
| C53 | 8.605445540  | 6.445447720  | 3.261928143 |
| C54 | 7.895260041  | 6.455478469  | 4.491667508 |
| C55 | 12.339583688 | 8.328715320  | 3.263415800 |
| C56 | 10.010016508 | 6.723854853  | 3.262304819 |
| C57 | 10.664086872 | 7.004524650  | 4.492145305 |
| C58 | 13.128668317 | 9.525188857  | 3.264580263 |
| C59 | 13.404455582 | 10.183257445 | 4.494578637 |
| C60 | 11.842903724 | 7.818141726  | 4.492849043 |
| C61 | 13.731516481 | 12.297244745 | 3.266359985 |
| C62 | 13.706521654 | 11.584010698 | 4.496197407 |
| C63 | 13.528171012 | 13.715836628 | 3.267468358 |
| C64 | 13.295443942 | 14.394160382 | 4.495902248 |
| C65 | 12.150515200 | 16.190723647 | 5.732740488 |
| C66 | 11.095150419 | 17.126669641 | 5.738886907 |
| C67 | 10.502534204 | 17.589604195 | 6.967842537 |
| C68 | 12.612283760 | 15.649033351 | 6.965365158 |
| C69 | 8.310349209  | 17.758418723 | 5.739183742 |
| C70 | 9.042764371  | 17.922126157 | 6.967758532 |

|      |              |              |             |
|------|--------------|--------------|-------------|
| C71  | 4.641819846  | 15.741954575 | 5.728484795 |
| C72  | 6.952194582  | 17.376256278 | 5.733116183 |
| C73  | 6.303435063  | 17.085201342 | 6.966043079 |
| C74  | 3.830581548  | 14.560073010 | 5.726445638 |
| C75  | 3.533552440  | 13.910245146 | 6.955861158 |
| C76  | 5.138785486  | 16.251492838 | 6.960651826 |
| C77  | 3.136919280  | 11.808996274 | 5.724137817 |
| C78  | 3.183903915  | 12.520226778 | 6.954290521 |
| C79  | 4.707019601  | 7.929141289  | 5.721912351 |
| C80  | 3.311161771  | 10.387277525 | 5.723018887 |
| C81  | 3.531006135  | 9.709145712  | 6.952585384 |
| C82  | 5.854667833  | 7.072730216  | 5.721487790 |
| C83  | 6.499227385  | 6.772693667  | 6.951163558 |
| C84  | 4.234836538  | 8.462058625  | 6.951756831 |
| C85  | 8.605488416  | 6.445446103  | 5.721436714 |
| C86  | 7.895390772  | 6.455424782  | 6.951128137 |
| C87  | 12.339647558 | 8.328661951  | 5.722790218 |
| C88  | 10.010108654 | 6.723767674  | 5.721791529 |
| C89  | 10.664083885 | 7.004290537  | 6.951626042 |
| C90  | 13.128399915 | 9.524871861  | 5.723834334 |
| C91  | 13.403843611 | 10.182792005 | 6.953999062 |
| C92  | 11.843095489 | 7.818147850  | 6.952389357 |
| C93  | 13.726137593 | 12.297409562 | 5.726012239 |
| C94  | 13.704048271 | 11.583891773 | 6.955513437 |
| C95  | 13.519069867 | 13.715090824 | 5.727894857 |
| C96  | 13.295135243 | 14.391449818 | 6.960036149 |
| C97  | 12.172310498 | 16.216407075 | 8.192240224 |
| C98  | 11.097305090 | 17.162706723 | 8.200894599 |
| C99  | 10.445470367 | 17.460124818 | 9.422815919 |
| C100 | 12.621353953 | 15.656752153 | 9.423424793 |
| C101 | 8.324955600  | 17.790893724 | 8.201942916 |
| C102 | 9.041746746  | 17.776808327 | 9.422720294 |
| C103 | 4.639486833  | 15.742026391 | 8.189347050 |
| C104 | 6.944513260  | 17.404910140 | 8.193217447 |
| C105 | 6.300042956  | 17.093926686 | 9.424176668 |
| C106 | 3.829055832  | 14.558966340 | 8.186659837 |
| C107 | 3.533179044  | 13.910227333 | 9.415712042 |
| C108 | 5.137983787  | 16.253466686 | 9.419510450 |
| C109 | 3.136984812  | 11.808990776 | 8.183855459 |
| C110 | 3.183699970  | 12.519884274 | 9.413994286 |
| C111 | 4.706958336  | 7.929142159  | 8.181378408 |
| C112 | 3.310954427  | 10.386962774 | 8.182579353 |
| C113 | 3.531011278  | 9.709007120  | 9.412168213 |
| C114 | 5.854673862  | 7.072690916  | 8.180947761 |

|      |              |              |             |
|------|--------------|--------------|-------------|
| C115 | 6.499288311  | 6.772668659  | 9.410661952 |
| C116 | 4.234779627  | 8.462028491  | 9.411305245 |
| C117 | 8.605461993  | 6.445413454  | 8.180899400 |
| C118 | 7.895320663  | 6.455435451  | 9.410627779 |
| C119 | 12.339618284 | 8.328321084  | 8.182388332 |
| C120 | 10.010163129 | 6.723766310  | 8.181262938 |
| C121 | 10.664095005 | 7.004263917  | 9.411182320 |
| C122 | 13.128226389 | 9.525027958  | 8.183613404 |
| C123 | 13.403576657 | 10.182619087 | 9.413746564 |
| C124 | 11.842968901 | 7.818071436  | 9.411990087 |
| C125 | 13.726959169 | 12.295840739 | 8.186322624 |
| C126 | 13.704040798 | 11.583962725 | 9.415414907 |
| C127 | 13.521544189 | 13.714406795 | 8.188867845 |
| C128 | 13.297998229 | 14.393726146 | 9.418859762 |
| Ir1  | -4.309438659 | -4.141531520 | 5.083419197 |
| Ir2  | -3.543927730 | -6.470845381 | 4.320343793 |
| Ir3  | -6.002580513 | -5.925137995 | 4.320358024 |
| Ir4  | -4.768867080 | -6.171803007 | 6.555408702 |
| C129 | 10.829882160 | 23.855618213 | 5.634622351 |
| O1   | 10.842607442 | 24.656009269 | 6.496680536 |

(10, 10)-Ir<sub>4</sub>-CO

|     |              |              |             |
|-----|--------------|--------------|-------------|
| C1  | 12.027798213 | 15.459162463 | 0.220791193 |
| C2  | 10.911564728 | 16.346287942 | 0.219459454 |
| C3  | 10.310675187 | 16.724436749 | 1.445903606 |
| C4  | 12.510187383 | 14.943350917 | 1.449870233 |
| C5  | 8.250501719  | 17.324314368 | 0.209015583 |
| C6  | 8.970012185  | 17.260497418 | 1.432792035 |
| C7  | 4.166582202  | 16.302782563 | 0.211717667 |
| C8  | 6.827261731  | 17.285483458 | 0.211560349 |
| C9  | 6.124588067  | 17.146779194 | 1.441411151 |
| C10 | 3.022906936  | 15.442267447 | 0.212522214 |
| C11 | 2.523837271  | 14.937584382 | 1.442809239 |
| C12 | 4.787284757  | 16.645391374 | 1.441683131 |
| C13 | 1.345792405  | 13.154315745 | 0.213633628 |
| C14 | 1.677967157  | 13.782991814 | 1.443304319 |
| C15 | 0.815263047  | 8.968885492  | 0.214703982 |
| C16 | 0.876388365  | 11.803391661 | 0.214043152 |
| C17 | 0.748895379  | 11.103534091 | 1.443867245 |
| C18 | 1.234152973  | 7.600652977  | 0.215095618 |
| C19 | 1.547003597  | 6.962609060  | 1.444952709 |
| C20 | 0.717775765  | 9.673606377  | 1.444312286 |
| C21 | 2.868268069  | 5.284254258  | 0.215720071 |
| C22 | 2.371095405  | 5.791945109  | 1.445355903 |

|     |              |              |             |
|-----|--------------|--------------|-------------|
| C23 | 6.705123808  | 3.530023031  | 0.216753184 |
| C24 | 4.017979867  | 4.432218339  | 0.216135868 |
| C25 | 4.647602401  | 4.102102511  | 1.445996859 |
| C26 | 8.135210025  | 3.527380687  | 0.217171087 |
| C27 | 8.837487192  | 3.641363932  | 1.447027279 |
| C28 | 6.003326603  | 3.646641936  | 1.446389991 |
| C29 | 10.826008189 | 4.419085587  | 0.217764536 |
| C30 | 10.195025199 | 4.091631459  | 1.447407959 |
| C31 | 13.633099713 | 7.569546349  | 0.218838124 |
| C32 | 11.979840301 | 5.265825609  | 0.218148540 |
| C33 | 12.479664656 | 5.770843740  | 1.448027640 |
| C34 | 14.072005362 | 8.931048524  | 0.219273213 |
| C35 | 14.181651663 | 9.633717806  | 1.449425498 |
| C36 | 13.312964471 | 6.934774865  | 1.448411167 |
| C37 | 14.071842808 | 11.765896377 | 0.220242297 |
| C38 | 14.179521223 | 11.063679372 | 1.450239061 |
| C39 | 13.639138017 | 13.129230238 | 0.220838960 |
| C40 | 13.321267976 | 13.765716134 | 1.450464179 |
| C41 | 12.028978179 | 15.477255401 | 2.677081886 |
| C42 | 10.945368366 | 16.399553876 | 2.664211158 |
| C43 | 10.397032441 | 16.902442602 | 3.903813064 |
| C44 | 12.524332638 | 14.963099765 | 3.913688487 |
| C45 | 8.241383849  | 17.411126059 | 2.645884651 |
| C46 | 9.004467464  | 17.455880919 | 3.871863321 |
| C47 | 4.170825061  | 16.297594840 | 2.674076110 |
| C48 | 6.816275504  | 17.302649917 | 2.665423449 |
| C49 | 6.133684078  | 17.147638654 | 3.909368717 |
| C50 | 3.025063086  | 15.440964726 | 2.673516421 |
| C51 | 2.523694237  | 14.936001379 | 3.902423587 |
| C52 | 4.798498364  | 16.634396597 | 3.904398321 |
| C53 | 1.345425807  | 13.154184914 | 2.673069689 |
| C54 | 1.677260677  | 13.782692665 | 3.902871501 |
| C55 | 0.815376927  | 8.968929314  | 2.674189854 |
| C56 | 0.876156792  | 11.803365618 | 2.673509830 |
| C57 | 0.748274501  | 11.103463004 | 3.903405253 |
| C58 | 1.234320713  | 7.600748676  | 2.674597381 |
| C59 | 1.547061667  | 6.962649018  | 3.904456973 |
| C60 | 0.717571332  | 9.673616258  | 3.903823175 |
| C61 | 2.868348269  | 5.284335735  | 2.675230310 |
| C62 | 2.371177155  | 5.792047487  | 3.904857641 |
| C63 | 6.705134303  | 3.530066080  | 2.676252375 |
| C64 | 4.018026386  | 4.432273336  | 2.675642016 |
| C65 | 4.647641267  | 4.102166264  | 3.905499128 |
| C66 | 8.135225079  | 3.527416285  | 2.676667639 |

|      |              |              |             |
|------|--------------|--------------|-------------|
| C67  | 8.837482218  | 3.641404314  | 3.906532220 |
| C68  | 6.003345969  | 3.646709689  | 3.905887838 |
| C69  | 10.826008370 | 4.419029622  | 2.677271151 |
| C70  | 10.195011606 | 4.091649286  | 3.906926948 |
| C71  | 13.632827887 | 7.569255727  | 2.678367929 |
| C72  | 11.979864332 | 5.265691399  | 2.677669628 |
| C73  | 12.479634585 | 5.770746384  | 3.907595632 |
| C74  | 14.070882834 | 8.930774835  | 2.678840533 |
| C75  | 14.180929117 | 9.633835800  | 3.908620496 |
| C76  | 13.312917221 | 6.934626565  | 3.908043949 |
| C77  | 14.065617286 | 11.766570882 | 2.680127256 |
| C78  | 14.178185531 | 11.063750728 | 3.908931777 |
| C79  | 13.630906396 | 13.129488640 | 2.681170173 |
| C80  | 13.320783820 | 13.771664461 | 3.910381369 |
| C81  | 12.070030944 | 15.501650347 | 5.141222776 |
| C82  | 11.001251285 | 16.478787252 | 5.150769080 |
| C83  | 10.336639599 | 16.756032908 | 6.389869722 |
| C84  | 12.530108375 | 14.958151071 | 6.368349509 |
| C85  | 8.262004050  | 17.541362011 | 5.143105095 |
| C86  | 9.003307467  | 17.330088719 | 6.380635944 |
| C87  | 4.172887937  | 16.292256852 | 5.131977290 |
| C88  | 6.821296121  | 17.320425018 | 5.132511634 |
| C89  | 6.135165861  | 17.143975081 | 6.356523402 |
| C90  | 3.025725905  | 15.439424526 | 5.132244416 |
| C91  | 2.524114820  | 14.935781557 | 6.362065173 |
| C92  | 4.799002017  | 16.634341758 | 6.360308736 |
| C93  | 1.344555448  | 13.154225026 | 5.132704863 |
| C94  | 1.677047841  | 13.782487763 | 6.362304956 |
| C95  | 0.815083808  | 8.968860562  | 5.133682921 |
| C96  | 0.875436408  | 11.803259730 | 5.133049198 |
| C97  | 0.748094590  | 11.103425661 | 6.362908605 |
| C98  | 1.234208293  | 7.600737486  | 5.134085717 |
| C99  | 1.546928920  | 6.962615924  | 6.363955218 |
| C100 | 0.717307316  | 9.673520039  | 6.363331772 |
| C101 | 2.868375269  | 5.284376281  | 5.134731247 |
| C102 | 2.371111422  | 5.792012519  | 6.364356317 |
| C103 | 6.705146388  | 3.530111230  | 5.135756242 |
| C104 | 4.018044436  | 4.432334957  | 5.135141446 |
| C105 | 4.647632127  | 4.102171432  | 6.365002925 |
| C106 | 8.135211168  | 3.527459697  | 5.136175381 |
| C107 | 8.837469753  | 3.641403128  | 6.366051773 |
| C108 | 6.003337722  | 3.646704298  | 6.365395478 |
| C109 | 10.825981902 | 4.419057768  | 5.136812542 |
| C110 | 10.194990450 | 4.091668599  | 6.366453703 |

|      |              |              |             |
|------|--------------|--------------|-------------|
| C111 | 13.632934808 | 7.569322380  | 5.137851300 |
| C112 | 11.979808965 | 5.265735325  | 5.137248436 |
| C113 | 12.479605676 | 5.770935172  | 6.367107453 |
| C114 | 14.071326383 | 8.930966138  | 5.138231690 |
| C115 | 14.182455576 | 9.634021103  | 6.367736024 |
| C116 | 13.312946506 | 6.934867050  | 6.367518065 |
| C117 | 14.069009605 | 11.767671375 | 5.138400593 |
| C118 | 14.181732079 | 11.064292156 | 6.367740227 |
| C119 | 13.637439354 | 13.131765689 | 5.138393251 |
| C120 | 13.328773350 | 13.770262028 | 6.368410236 |
| C121 | 12.042607981 | 15.468570743 | 7.602231923 |
| C122 | 10.923462447 | 16.361648981 | 7.606940519 |
| C123 | 10.297722845 | 16.704073048 | 8.832766742 |
| C124 | 12.520585755 | 14.944567329 | 8.826657544 |
| C125 | 8.258361827  | 17.357960733 | 7.610112105 |
| C126 | 8.958756527  | 17.202761941 | 8.828129555 |
| C127 | 4.171653412  | 16.296314839 | 7.589636701 |
| C128 | 6.829194335  | 17.293940400 | 7.594723364 |
| C129 | 6.129231394  | 17.144090067 | 8.817268812 |
| C130 | 3.025486045  | 15.440296651 | 7.590814389 |
| C131 | 2.523548758  | 14.937044881 | 8.821298882 |
| C132 | 4.790973433  | 16.644314561 | 8.819522215 |
| C133 | 1.345182188  | 13.153992143 | 7.592226602 |
| C134 | 1.677809479  | 13.782738088 | 8.821720892 |
| C135 | 0.815029548  | 8.968850199  | 7.593218904 |
| C136 | 0.875779245  | 11.803229447 | 7.592604425 |
| C137 | 0.748529077  | 11.103458120 | 8.822479402 |
| C138 | 1.234063357  | 7.600660241  | 7.593606842 |
| C139 | 1.546831145  | 6.962521385  | 8.823456959 |
| C140 | 0.717517261  | 9.673578581  | 8.822873924 |
| C141 | 2.868284715  | 5.284303593  | 7.594226657 |
| C142 | 2.371020181  | 5.791916062  | 8.823853809 |
| C143 | 6.705120795  | 3.530056567  | 7.595257706 |
| C144 | 4.018003644  | 4.432265174  | 7.594641979 |
| C145 | 4.647589349  | 4.102086433  | 8.824495140 |
| C146 | 8.135209071  | 3.527403718  | 7.595678278 |
| C147 | 8.837474299  | 3.641361118  | 8.825536831 |
| C148 | 6.003318509  | 3.646636732  | 8.824890308 |
| C149 | 10.825979121 | 4.419114539  | 7.596301949 |
| C150 | 10.194998149 | 4.091664652  | 8.825928067 |
| C151 | 13.633063740 | 7.569703230  | 7.597262775 |
| C152 | 11.979794464 | 5.265861690  | 7.596719802 |
| C153 | 12.479633518 | 5.771062418  | 8.826540103 |
| C154 | 14.072190765 | 8.931195121  | 7.597545747 |

|      |              |               |             |
|------|--------------|---------------|-------------|
| C155 | 14.183263647 | 9.633813774   | 8.827567878 |
| C156 | 13.312969208 | 6.935055517   | 8.826911478 |
| C157 | 14.072731297 | 11.766706473  | 7.597708895 |
| C158 | 14.183242966 | 11.063871542  | 8.828091769 |
| C159 | 13.641310499 | 13.129827540  | 7.597574850 |
| C160 | 13.330958374 | 13.766855905  | 8.828309843 |
| Ir1  | -8.179211326 | -10.875491789 | 3.124116354 |
| Ir2  | -6.897131074 | -9.077745201  | 4.676741899 |
| Ir3  | -6.176594082 | -11.549120833 | 4.624053874 |
| Ir4  | -8.339436284 | -10.892295215 | 5.767790979 |
| C    | 11.692424637 | 22.221076368  | 5.781632050 |
| O    | 12.417621991 | 22.776655012  | 6.514229212 |

(7, 0)-Ir<sub>4</sub>-NO

|     |             |              |             |
|-----|-------------|--------------|-------------|
| C1  | 9.097250288 | 14.528686287 | 0.247574021 |
| C2  | 9.074379459 | 14.521498757 | 1.663829456 |
| C3  | 8.049382657 | 15.239872728 | 2.370984984 |
| C4  | 6.817503530 | 15.379292994 | 0.246730921 |
| C5  | 6.814128499 | 15.392990234 | 1.657268169 |
| C6  | 5.642809427 | 14.968017352 | 2.371983161 |
| C7  | 8.035986092 | 15.237728918 | 3.784281905 |
| C8  | 4.765712510 | 14.089022117 | 0.243438964 |
| C9  | 4.764917639 | 14.084360636 | 1.662099514 |
| C10 | 4.355403450 | 12.907250281 | 2.369774115 |
| C11 | 5.622861411 | 15.006699700 | 3.787099718 |
| C12 | 4.488142202 | 11.671037120 | 0.241948630 |
| C13 | 4.495276336 | 11.670806600 | 1.661473750 |
| C14 | 5.147830691 | 10.608585077 | 2.376491632 |
| C15 | 4.372059153 | 12.909359845 | 3.789301657 |
| C16 | 6.185223709 | 9.935093404  | 0.245791045 |
| C17 | 6.180671757 | 9.916773269  | 1.663926648 |
| C18 | 7.415396987 | 9.752075755  | 2.377255439 |
| C19 | 5.154441268 | 10.608128215 | 3.795822805 |
| C20 | 8.603418893 | 10.151189425 | 0.248657344 |
| C21 | 8.592001707 | 10.166716429 | 1.667318742 |
| C22 | 9.469950081 | 11.046325078 | 2.381131072 |
| C23 | 7.418475851 | 9.733033935  | 3.794713377 |
| C24 | 9.865819046 | 12.223601710 | 0.256968170 |
| C25 | 9.883165473 | 12.224806209 | 1.676288118 |
| C26 | 9.709900247 | 13.459738412 | 2.383810363 |
| C27 | 9.447155390 | 11.055464443 | 3.799188354 |
| C28 | 9.718415302 | 13.480015464 | 3.803649277 |
| C29 | 9.097730106 | 14.567707234 | 4.505989826 |
| C30 | 9.078973849 | 14.553592618 | 5.918317874 |



|     |             |              |              |
|-----|-------------|--------------|--------------|
| C31 | 8.107667504 | 15.372781708 | 6.619004239  |
| C32 | 6.799852575 | 15.436818509 | 4.484406683  |
| C33 | 6.788941972 | 15.542719884 | 5.923460680  |
| C34 | 5.594082484 | 15.006726064 | 6.600618842  |
| C35 | 8.115325147 | 15.373392288 | 8.070902421  |
| C36 | 4.751461204 | 14.095508831 | 4.492020054  |
| C37 | 4.754430828 | 14.075159783 | 5.901033607  |
| C38 | 4.375872038 | 12.915693170 | 6.630612255  |
| C39 | 5.589129221 | 15.100671989 | 8.031292388  |
| C40 | 4.518623580 | 11.676452845 | 4.509554884  |
| C41 | 4.527565737 | 11.677838014 | 5.928968998  |
| C42 | 5.172469715 | 10.613512568 | 6.645380646  |
| C43 | 4.489466653 | 12.943974845 | 8.052443938  |
| C44 | 6.186059201 | 9.909186438  | 4.508850683  |
| C45 | 6.184280301 | 9.897849453  | 5.928928145  |
| C46 | 7.420255595 | 9.734689264  | 6.639184209  |
| C47 | 5.146882650 | 10.583687263 | 8.066062209  |
| C48 | 8.596057522 | 10.145402172 | 4.505296464  |
| C49 | 8.591123137 | 10.159525906 | 5.924731139  |
| C50 | 9.463685712 | 11.044135392 | 6.636764855  |
| C51 | 7.417273521 | 9.740446873  | 8.054006714  |
| C52 | 9.818853805 | 12.241149120 | 4.515230149  |
| C53 | 9.851167132 | 12.232985679 | 5.931928630  |
| C54 | 9.652848547 | 13.459396301 | 6.639011398  |
| C55 | 9.450894291 | 11.048045467 | 8.057088828  |
| C56 | 9.684908781 | 13.467774458 | 8.061877442  |
| C57 | 9.094514896 | 14.546659993 | 8.783348648  |
| C58 | 9.058246412 | 14.489407998 | 10.195326874 |
| C59 | 8.079395796 | 15.237414171 | 10.936008870 |
| C60 | 6.813747106 | 15.510896872 | 8.793398909  |
| C61 | 6.839113363 | 15.553061866 | 10.241392965 |
| C62 | 5.625562221 | 15.073119830 | 10.911439048 |
| C63 | 8.089804772 | 15.258694163 | 12.338106724 |
| C64 | 4.733624634 | 14.165064269 | 8.757396663  |
| C65 | 4.876888681 | 14.081124202 | 10.163446267 |
| C66 | 4.411567546 | 12.929946849 | 10.880787005 |
| C67 | 5.645243943 | 15.000846125 | 12.324609268 |
| C68 | 4.626504501 | 11.714305845 | 8.777927695  |
| C69 | 4.470246589 | 11.676106316 | 10.185166579 |
| C70 | 5.170921028 | 10.645806260 | 10.899541193 |
| C71 | 4.386907370 | 12.935139183 | 12.305311907 |
| C72 | 6.180115503 | 9.884296473  | 8.768636222  |
| C73 | 6.200647026 | 9.948303898  | 10.185562951 |
| C74 | 7.426696757 | 9.736088197  | 10.898905123 |

|      |              |              |              |
|------|--------------|--------------|--------------|
| C75  | 5.150379293  | 10.622420135 | 12.315419378 |
| C76  | 8.595949309  | 10.147690675 | 8.768048448  |
| C77  | 8.598096188  | 10.156291933 | 10.187331084 |
| C78  | 9.460586427  | 11.051722677 | 10.902602084 |
| C79  | 7.424023490  | 9.775204229  | 12.313861733 |
| C80  | 9.830452696  | 12.232125334 | 8.771339230  |
| C81  | 9.896484718  | 12.219382521 | 10.190307500 |
| C82  | 9.753287307  | 13.455007178 | 10.900740093 |
| C83  | 9.504187579  | 11.019545029 | 12.322863285 |
| C84  | 9.696698439  | 13.438191615 | 12.318208924 |
| C85  | 9.113503622  | 14.534196485 | 13.035759905 |
| C86  | 9.088776828  | 14.510079558 | 14.450991919 |
| C87  | 8.061459385  | 15.220192153 | 15.162954113 |
| C88  | 6.836195281  | 15.368365859 | 13.047912848 |
| C89  | 6.826226182  | 15.405732863 | 14.453834534 |
| C90  | 5.651616349  | 14.972032742 | 15.162690762 |
| C91  | 8.053656090  | 15.206875725 | 16.573708146 |
| C92  | 4.750357318  | 14.122134460 | 13.022268965 |
| C93  | 4.783977828  | 14.086404153 | 14.442089062 |
| C94  | 4.345158211  | 12.919051353 | 15.149465343 |
| C95  | 5.634484903  | 14.985072724 | 16.575894369 |
| C96  | 4.523457028  | 11.700817661 | 13.021748499 |
| C97  | 4.487897002  | 11.683728174 | 14.440349171 |
| C98  | 5.155730255  | 10.631028055 | 15.153916712 |
| C99  | 4.368576237  | 12.911344216 | 16.570430299 |
| C100 | 6.189292419  | 9.935791910  | 13.026425584 |
| C101 | 6.189897369  | 9.936077075  | 14.443835348 |
| C102 | 7.420878859  | 9.753794420  | 15.157138895 |
| C103 | 5.136329997  | 10.607895469 | 16.572273361 |
| C104 | 8.612257929  | 10.148345329 | 13.030150834 |
| C105 | 8.601602941  | 10.158693523 | 14.449075752 |
| C106 | 9.479193161  | 11.039735678 | 15.164125965 |
| C107 | 7.418838421  | 9.768191414  | 16.574454948 |
| C108 | 9.868835158  | 12.210914904 | 13.034191525 |
| C109 | 9.891055951  | 12.214021845 | 14.453477846 |
| C110 | 9.740245162  | 13.451437394 | 15.162916187 |
| C111 | 9.479674455  | 11.039247470 | 16.583925900 |
| C112 | 9.743264694  | 13.459128453 | 16.582350893 |
| Ir1  | -9.191159504 | -8.986763728 | 6.952488380  |
| Ir2  | -8.357389650 | -6.704096644 | 7.765770572  |
| Ir3  | -6.718884700 | -8.647879067 | 7.567091613  |
| Ir4  | -8.529496660 | -8.648551070 | 9.427406482  |
| N    | 6.909413572  | 21.222990320 | 8.651498622  |
| O    | 7.402310520  | 21.599637133 | 9.654411099  |

(8, 0)-Ir<sub>4</sub>-NO

|     |              |              |             |
|-----|--------------|--------------|-------------|
| C1  | 9.739822345  | 14.407007277 | 1.978385121 |
| C2  | 9.825219203  | 14.491677517 | 3.405800076 |
| C3  | 8.723863303  | 15.218326004 | 4.095288463 |
| C4  | 8.703585387  | 15.100798813 | 1.272675076 |
| C5  | 7.486169313  | 15.395496141 | 1.991547085 |
| C6  | 7.470884240  | 15.425753939 | 3.392631139 |
| C7  | 6.233571833  | 15.334985346 | 4.113085594 |
| C8  | 6.252605143  | 15.275435732 | 1.275525017 |
| C9  | 5.122821112  | 14.748224946 | 1.986280126 |
| C10 | 5.096179920  | 14.781151244 | 3.411366807 |
| C11 | 4.374979943  | 13.751758702 | 4.116891021 |
| C12 | 4.363537254  | 13.760367114 | 1.282554095 |
| C13 | 4.021590930  | 12.563639599 | 1.989961673 |
| C14 | 3.973776684  | 12.570680530 | 3.414195417 |
| C15 | 4.188170473  | 11.343405989 | 4.118438155 |
| C16 | 4.194204910  | 11.330418506 | 1.280186893 |
| C17 | 4.811252122  | 10.251391589 | 1.987931010 |
| C18 | 4.845406607  | 10.285417699 | 3.411729211 |
| C19 | 5.850835050  | 9.552604380  | 4.128636661 |
| C20 | 5.836983106  | 9.542182423  | 1.278453592 |
| C21 | 7.044782074  | 9.251607055  | 1.994463169 |
| C22 | 7.046510086  | 9.217743048  | 3.413313605 |
| C23 | 8.274739289  | 9.391903082  | 4.115652583 |
| C24 | 8.274077062  | 9.413938271  | 1.281348876 |
| C25 | 9.395663019  | 9.956575062  | 1.985142523 |
| C26 | 9.392669178  | 9.943739242  | 3.404727380 |
| C27 | 10.143775759 | 10.937566584 | 4.118019015 |
| C28 | 10.159107871 | 10.942074699 | 1.286307847 |
| C29 | 10.640196418 | 12.103785114 | 1.985280214 |
| C30 | 10.628650121 | 12.098964914 | 3.430599346 |
| C31 | 10.385734560 | 13.333238049 | 4.127295461 |
| C32 | 10.396421290 | 13.349033937 | 1.276459154 |
| C33 | 9.815300312  | 14.471504858 | 6.241637617 |
| C34 | 9.849510707  | 14.512387167 | 7.685327390 |
| C35 | 8.680188993  | 15.106079845 | 8.396543291 |
| C36 | 8.713645401  | 15.204299971 | 5.553258095 |
| C37 | 7.484789092  | 15.578409524 | 6.257221240 |
| C38 | 7.475943797  | 15.477408082 | 7.699999048 |
| C39 | 6.215389653  | 15.424978199 | 8.388259089 |
| C40 | 6.232939190  | 15.314802927 | 5.529060315 |
| C41 | 5.136656362  | 14.739254626 | 6.238143765 |
| C42 | 5.126623095  | 14.760058211 | 7.676523337 |

|     |              |              |              |
|-----|--------------|--------------|--------------|
| C43 | 4.319475168  | 13.785793844 | 8.382032837  |
| C44 | 4.336582703  | 13.770839774 | 5.542157144  |
| C45 | 3.958912519  | 12.573372888 | 6.247052185  |
| C46 | 3.936077731  | 12.570667611 | 7.683081024  |
| C47 | 4.042662093  | 11.303321677 | 8.367685058  |
| C48 | 4.247634615  | 11.369950588 | 5.541291684  |
| C49 | 4.883378546  | 10.324869169 | 6.256104164  |
| C50 | 4.876377632  | 10.355520712 | 7.670641898  |
| C51 | 5.881522464  | 9.628263010  | 8.388394554  |
| C52 | 5.856172737  | 9.553823818  | 5.545112540  |
| C53 | 7.059284160  | 9.247516728  | 6.254322102  |
| C54 | 7.065072048  | 9.265657381  | 7.670524397  |
| C55 | 8.298857614  | 9.354881636  | 8.378132993  |
| C56 | 8.285202651  | 9.384381593  | 5.537357991  |
| C57 | 9.402886963  | 9.931205320  | 6.246932358  |
| C58 | 9.388085122  | 9.955865338  | 7.670598523  |
| C59 | 10.158850871 | 10.932749306 | 8.381650745  |
| C60 | 10.158514352 | 10.919579157 | 5.544802091  |
| C61 | 10.527903356 | 12.108598339 | 6.247459781  |
| C62 | 10.547598488 | 12.118459144 | 7.683307980  |
| C63 | 10.397605794 | 13.349346645 | 8.392900755  |
| C64 | 10.377844033 | 13.331010806 | 5.527493569  |
| C65 | 9.725137445  | 14.411727599 | 10.515860487 |
| C66 | 9.729731284  | 14.412233696 | 11.924541136 |
| C67 | 8.700812047  | 15.106879407 | 12.642916394 |
| C68 | 8.683666304  | 15.102509217 | 9.801922098  |
| C69 | 7.491316154  | 15.428574923 | 10.516368515 |
| C70 | 7.494340508  | 15.397198214 | 11.929123561 |
| C71 | 6.261243732  | 15.274682864 | 12.644022449 |
| C72 | 6.250380077  | 15.321159197 | 9.808343002  |
| C73 | 5.154994811  | 14.713766451 | 10.515465643 |
| C74 | 5.157146266  | 14.713454292 | 11.932910765 |
| C75 | 4.372239288  | 13.756744312 | 12.641959338 |
| C76 | 4.296806224  | 13.805926226 | 9.810274584  |
| C77 | 4.027002407  | 12.584697881 | 10.504826339 |
| C78 | 4.037046302  | 12.567500189 | 11.929035261 |
| C79 | 4.201104168  | 11.336213845 | 12.634828134 |
| C80 | 4.225803706  | 11.363899136 | 9.789665729  |
| C81 | 4.872512279  | 10.306322152 | 10.503936433 |
| C82 | 4.852714342  | 10.283732170 | 11.924384036 |
| C83 | 5.843128700  | 9.540648294  | 12.640708249 |
| C84 | 5.860876440  | 9.560277488  | 9.795949295  |
| C85 | 7.054925064  | 9.223375627  | 10.509694117 |
| C86 | 7.050736605  | 9.230349264  | 11.929270403 |

|     |              |              |              |
|-----|--------------|--------------|--------------|
| C87 | 8.276833776  | 9.389898520  | 12.642013493 |
| C88 | 8.291039263  | 9.366205609  | 9.801876055  |
| C89 | 9.380837553  | 9.960599484  | 10.513117857 |
| C90 | 9.376540417  | 9.967646753  | 11.934575432 |
| C91 | 10.157018764 | 10.932522710 | 12.641834744 |
| C92 | 10.169139526 | 10.922098970 | 9.806079876  |
| C93 | 10.519117750 | 12.110874146 | 10.510986458 |
| C94 | 10.520902704 | 12.114834881 | 11.930055059 |
| C95 | 10.389803807 | 13.351994862 | 12.640175594 |
| C96 | 10.382212159 | 13.346620494 | 9.799409825  |
| Ir1 | -4.026275309 | -7.481888755 | 5.583783901  |
| Ir2 | -4.172678056 | -9.773314492 | 6.739761151  |
| Ir3 | -4.641428111 | -9.536525248 | 4.197253086  |
| Ir4 | -6.294004548 | -8.671147093 | 5.994416300  |
| N   | 11.922375715 | 20.108272532 | 6.447335206  |
| O   | 12.306652062 | 20.470692504 | 7.494864406  |

(10, 0)-Ir<sub>4</sub>-NO

|     |              |              |             |
|-----|--------------|--------------|-------------|
| C1  | 10.709701413 | 15.100888908 | 1.328111476 |
| C2  | 10.709705959 | 15.105163014 | 2.744559327 |
| C3  | 9.807186298  | 15.961632633 | 3.441421996 |
| C4  | 9.802423619  | 15.946868233 | 0.622866751 |
| C5  | 8.673345791  | 16.465472512 | 1.327002620 |
| C6  | 8.675714304  | 16.476211306 | 2.737819322 |
| C7  | 7.442267594  | 16.608256796 | 3.448422930 |
| C8  | 7.437728607  | 16.591286764 | 0.625723631 |
| C9  | 6.229549244  | 16.315643413 | 1.334913992 |
| C10 | 6.232689930  | 16.318566065 | 2.749672085 |
| C11 | 5.178382608  | 15.672774332 | 3.462485050 |
| C12 | 5.167940310  | 15.674490096 | 0.631456140 |
| C13 | 4.352253317  | 14.745327323 | 1.339191365 |
| C14 | 4.358304661  | 14.744066809 | 2.759977693 |
| C15 | 3.854769783  | 13.612296094 | 3.468941692 |
| C16 | 3.847412260  | 13.615093467 | 0.630480224 |
| C17 | 3.708164406  | 12.385355669 | 1.338409869 |
| C18 | 3.710070260  | 12.384225336 | 2.760223244 |
| C19 | 3.948260784  | 11.168456540 | 3.468882974 |
| C20 | 3.946876030  | 11.170918742 | 0.629060181 |
| C21 | 4.553173158  | 10.089040903 | 1.337497669 |
| C22 | 4.553487845  | 10.087244719 | 2.759576763 |
| C23 | 5.466981755  | 9.251327086  | 3.467420368 |
| C24 | 5.466910120  | 9.253603721  | 0.629656444 |
| C25 | 6.596257019  | 8.743720144  | 1.337818227 |
| C26 | 6.596686137  | 8.742540508  | 2.759511798 |

|     |              |              |             |
|-----|--------------|--------------|-------------|
| C27 | 7.828497724  | 8.612599234  | 3.468165202 |
| C28 | 7.828171499  | 8.613732479  | 0.629322947 |
| C29 | 9.037860419  | 8.877210044  | 1.338114578 |
| C30 | 9.038563825  | 8.877361590  | 2.759425702 |
| C31 | 10.103017636 | 9.512399310  | 3.467893884 |
| C32 | 10.102878871 | 9.510844796  | 0.629337433 |
| C33 | 10.920280774 | 10.440058961 | 1.336992914 |
| C34 | 10.920123365 | 10.442576648 | 2.759445236 |
| C35 | 11.414208072 | 11.577419841 | 3.465943436 |
| C36 | 11.417988160 | 11.572163031 | 0.628021696 |
| C37 | 11.551412619 | 12.803130325 | 1.335037897 |
| C38 | 11.548632483 | 12.806879218 | 2.754740772 |
| C39 | 11.303531729 | 14.022535134 | 3.457860519 |
| C40 | 11.309317009 | 14.016268640 | 0.624938151 |
| C41 | 10.703421842 | 15.118140143 | 5.574800084 |
| C42 | 10.703831881 | 15.117556045 | 6.995732003 |
| C43 | 9.856861475  | 16.039330886 | 7.687232863 |
| C44 | 9.814085184  | 15.987695426 | 4.852860718 |
| C45 | 8.701458650  | 16.558433748 | 5.538103164 |
| C46 | 8.761129370  | 16.694323023 | 6.960856241 |
| C47 | 7.387035100  | 16.769624958 | 7.717967086 |
| C48 | 7.448643022  | 16.642357232 | 4.859736701 |
| C49 | 6.229865012  | 16.347197129 | 5.582909446 |
| C50 | 6.207805089  | 16.350058615 | 6.997460721 |
| C51 | 5.188998890  | 15.669478685 | 7.718922644 |
| C52 | 5.184861707  | 15.675597843 | 4.883233781 |
| C53 | 4.369211133  | 14.742602938 | 5.595825114 |
| C54 | 4.372520829  | 14.737928070 | 7.017352302 |
| C55 | 3.863464570  | 13.610269951 | 7.727743862 |
| C56 | 3.858841636  | 13.611875307 | 4.889921078 |
| C57 | 3.714039203  | 12.383323638 | 5.598711203 |
| C58 | 3.714617559  | 12.382552262 | 7.020429518 |
| C59 | 3.949036380  | 11.166524575 | 7.729510124 |
| C60 | 3.948757027  | 11.167451867 | 4.889757683 |
| C61 | 4.553707417  | 10.085311722 | 5.598464243 |
| C62 | 4.553896330  | 10.084355738 | 7.020393794 |
| C63 | 5.467760095  | 9.249153324  | 7.727974534 |
| C64 | 5.467338001  | 9.250097405  | 4.890073252 |
| C65 | 6.597210159  | 8.740721466  | 5.598153991 |
| C66 | 6.597674192  | 8.739869550  | 7.019527523 |
| C67 | 7.829931578  | 8.609113417  | 7.727726895 |
| C68 | 7.829446763  | 8.611519673  | 4.889246289 |
| C69 | 9.039837076  | 8.874926641  | 5.597681171 |
| C70 | 9.040872898  | 8.873156138  | 7.018596079 |

|      |              |              |              |
|------|--------------|--------------|--------------|
| C71  | 10.106917348 | 9.507597863  | 7.726832655  |
| C72  | 10.104513203 | 9.512014468  | 4.889169837  |
| C73  | 10.920238791 | 10.443654803 | 5.596353025  |
| C74  | 10.922517169 | 10.442456424 | 7.018786152  |
| C75  | 11.412904039 | 11.578991011 | 7.725307948  |
| C76  | 11.412032194 | 11.580989145 | 4.888085031  |
| C77  | 11.537719506 | 12.813643908 | 5.593845011  |
| C78  | 11.536174895 | 12.815196693 | 7.015612136  |
| C79  | 11.291095935 | 14.029294690 | 7.719567741  |
| C80  | 11.295311196 | 14.028364477 | 4.878785907  |
| C81  | 10.744493012 | 15.103915683 | 9.876378041  |
| C82  | 10.719476774 | 15.111969896 | 11.295609203 |
| C83  | 9.833060912  | 15.994591292 | 12.019368157 |
| C84  | 9.915176195  | 16.050324011 | 9.183395479  |
| C85  | 8.742275018  | 16.561231414 | 9.855622900  |
| C86  | 8.702519658  | 16.603200445 | 11.366475544 |
| C87  | 7.437923555  | 16.671840826 | 12.037779531 |
| C88  | 7.411225224  | 16.688673366 | 9.164552480  |
| C89  | 6.232925151  | 16.328555661 | 9.874034811  |
| C90  | 6.239897776  | 16.341156176 | 11.300725912 |
| C91  | 5.186297562  | 15.684555378 | 11.995533462 |
| C92  | 5.189706498  | 15.672579159 | 9.151801435  |
| C93  | 4.373214763  | 14.743496719 | 9.858360136  |
| C94  | 4.371946054  | 14.748906132 | 11.281755240 |
| C95  | 3.861085445  | 13.619526090 | 11.987579999 |
| C96  | 3.862567229  | 13.612595521 | 9.150481134  |
| C97  | 3.714674903  | 12.385490280 | 9.858569009  |
| C98  | 3.715185675  | 12.388411044 | 11.279893357 |
| C99  | 3.950385249  | 11.172319195 | 11.988314006 |
| C100 | 3.949020955  | 11.167656782 | 9.150070626  |
| C101 | 4.554089833  | 10.086061377 | 9.858534402  |
| C102 | 4.554359947  | 10.088038345 | 11.280116314 |
| C103 | 5.467669907  | 9.252196250  | 11.987534560 |
| C104 | 5.467860237  | 9.249542140  | 9.150375621  |
| C105 | 6.597513412  | 8.739956237  | 9.857966644  |
| C106 | 6.597158374  | 8.740813705  | 11.279318205 |
| C107 | 7.828828340  | 8.609875774  | 11.987597515 |
| C108 | 7.829998806  | 8.608572977  | 9.148786572  |
| C109 | 9.040631871  | 8.870873567  | 9.856878674  |
| C110 | 9.039852335  | 8.871534621  | 11.278203020 |
| C111 | 10.104454158 | 9.506112142  | 11.986760669 |
| C112 | 10.106928690 | 9.505824438  | 9.147745503  |
| C113 | 10.922168721 | 10.438190823 | 9.855219606  |
| C114 | 10.921086172 | 10.437256204 | 11.278159617 |

|      |              |              |              |
|------|--------------|--------------|--------------|
| C115 | 11.412309415 | 11.571693380 | 11.986914471 |
| C116 | 11.412367770 | 11.576296302 | 9.147630231  |
| C117 | 11.538863411 | 12.806417395 | 9.857038377  |
| C118 | 11.539167878 | 12.803565376 | 11.279279045 |
| C119 | 11.293720542 | 14.015134230 | 11.995300347 |
| C120 | 11.298792915 | 14.023509917 | 9.149908066  |
| C121 | 10.709444742 | 15.102705699 | 14.126369503 |
| C122 | 10.708953481 | 15.100929428 | 15.542585574 |
| C123 | 9.803177447  | 15.948752757 | 16.249764103 |
| C124 | 9.816077203  | 15.971423301 | 13.427235897 |
| C125 | 8.677559585  | 16.494454608 | 14.139327397 |
| C126 | 8.674689813  | 16.474017462 | 15.548594496 |
| C127 | 7.437025440  | 16.595272036 | 16.254871119 |
| C128 | 7.434903513  | 16.634536976 | 13.442134519 |
| C129 | 6.227143566  | 16.333401912 | 14.136596090 |
| C130 | 6.226312143  | 16.322293460 | 15.550284929 |
| C131 | 5.166489454  | 15.677899983 | 16.252904070 |
| C132 | 5.173783546  | 15.687605829 | 13.419063690 |
| C133 | 4.354656637  | 14.754585725 | 14.120283998 |
| C134 | 4.349411134  | 14.751256083 | 15.542146263 |
| C135 | 3.846718264  | 13.617613587 | 16.248550764 |
| C136 | 3.854771529  | 13.620184873 | 13.410138307 |
| C137 | 3.710412315  | 12.390429494 | 14.117183264 |
| C138 | 3.707752618  | 12.388486341 | 15.539231388 |
| C139 | 3.947013274  | 11.172531326 | 16.247551644 |
| C140 | 3.949808170  | 11.173358540 | 13.408941749 |
| C141 | 4.554184861  | 10.091102099 | 14.117321493 |
| C142 | 4.553756865  | 10.090872958 | 15.539249186 |
| C143 | 5.466808410  | 9.254469963  | 16.246900468 |
| C144 | 5.467558305  | 9.253611413  | 13.409844121 |
| C145 | 6.596480073  | 8.743430156  | 14.117674736 |
| C146 | 6.596301331  | 8.744053349  | 15.539264714 |
| C147 | 7.827671978  | 8.613465366  | 16.248017960 |
| C148 | 7.828353086  | 8.611226454  | 13.408881864 |
| C149 | 9.037988129  | 8.874117366  | 14.117632689 |
| C150 | 9.037821992  | 8.875541415  | 15.539053432 |
| C151 | 10.102411716 | 9.509573034  | 16.247902038 |
| C152 | 10.103429196 | 9.506929840  | 13.408245702 |
| C153 | 10.919391781 | 10.436941612 | 14.116768574 |
| C154 | 10.919936277 | 10.437714253 | 15.539177714 |
| C155 | 11.417247707 | 11.570534409 | 16.246932139 |
| C156 | 11.413455496 | 11.570713311 | 13.408756639 |
| C157 | 11.544408882 | 12.800584544 | 14.119340905 |
| C158 | 11.548995184 | 12.800595057 | 15.538244369 |



|      |              |              |              |
|------|--------------|--------------|--------------|
| C159 | 11.307955632 | 14.014973294 | 16.246279882 |
| C160 | 11.298771524 | 14.015383089 | 13.415634565 |
| Ir1  | -5.289825860 | -5.958805242 | 8.828437988  |
| Ir2  | -4.472914979 | -8.402704561 | 8.437376709  |
| Ir3  | -6.784118100 | -7.665830885 | 7.599980400  |
| Ir4  | -6.374055724 | -7.860125727 | 10.092958888 |
| O    | 10.480009485 | 22.100453160 | 7.092776410  |
| N    | 10.249920035 | 21.494961839 | 8.082170426  |

(7, 7)-Ir<sub>4</sub>-NO

|     |              |              |             |
|-----|--------------|--------------|-------------|
| C1  | 11.587169991 | 14.749876632 | 0.465137875 |
| C2  | 7.964052011  | 16.777198523 | 0.457652870 |
| C3  | 10.613718349 | 15.800743705 | 0.463148633 |
| C4  | 10.029588799 | 16.210596996 | 1.687776256 |
| C5  | 6.542728277  | 16.572271105 | 0.463992590 |
| C6  | 5.871724721  | 16.304361888 | 1.689065895 |
| C7  | 8.691676131  | 16.718345799 | 1.670828418 |
| C8  | 4.207421927  | 14.964582788 | 0.468001546 |
| C9  | 4.693970570  | 15.484145813 | 1.695217969 |
| C10 | 3.091678654  | 10.943206541 | 0.467340239 |
| C11 | 3.452148691  | 13.746159328 | 0.467190580 |
| C12 | 3.208124108  | 13.074185004 | 1.696226019 |
| C13 | 3.536750469  | 9.582174115  | 0.467405465 |
| C14 | 3.903331483  | 8.971047962  | 1.697267752 |
| C15 | 3.025573956  | 11.653693545 | 1.696674076 |
| C16 | 5.501613570  | 7.559629942  | 0.467333232 |
| C17 | 4.899906039  | 7.942594566  | 1.697117071 |
| C18 | 9.650606856  | 7.440707455  | 0.466866885 |
| C19 | 6.852781170  | 7.085485906  | 0.467166764 |
| C20 | 7.561848492  | 7.010740010  | 1.696856386 |
| C21 | 10.846327292 | 8.229873521  | 0.466702328 |
| C22 | 11.341546207 | 8.741372221  | 1.696421305 |
| C23 | 8.982796132  | 7.191506034  | 1.696684997 |
| C24 | 12.313810201 | 10.641274508 | 0.467082248 |
| C25 | 12.083670396 | 9.965938981  | 1.696265229 |
| C26 | 12.474304026 | 12.064627953 | 0.467192417 |
| C27 | 12.393261320 | 12.774268008 | 1.696140610 |
| C28 | 11.942781522 | 14.134480654 | 1.695688255 |
| C29 | 11.578761732 | 14.748207502 | 2.926294526 |
| C30 | 7.968420318  | 16.848175394 | 2.896326128 |
| C31 | 10.622952981 | 15.813390297 | 2.929732611 |
| C32 | 10.077937171 | 16.258993261 | 4.159704843 |
| C33 | 6.527768604  | 16.588326379 | 2.915676393 |
| C34 | 5.862942954  | 16.301583445 | 4.150503783 |

|     |              |              |             |
|-----|--------------|--------------|-------------|
| C35 | 8.736066194  | 16.853895817 | 4.147135046 |
| C36 | 4.197323228  | 14.964078052 | 2.925874854 |
| C37 | 4.683815991  | 15.470098645 | 4.155893293 |
| C38 | 3.089064871  | 10.943922942 | 2.926586584 |
| C39 | 3.444412431  | 13.745640900 | 2.926000427 |
| C40 | 3.202522438  | 13.074184889 | 4.156227446 |
| C41 | 3.535765567  | 9.582913919  | 2.926758929 |
| C42 | 3.902880931  | 8.971466784  | 4.156564749 |
| C43 | 3.021879734  | 11.653702448 | 4.156512759 |
| C44 | 5.501743393  | 7.560138635  | 2.926842335 |
| C45 | 4.899819871  | 7.943180080  | 4.156500948 |
| C46 | 9.650927902  | 7.440063768  | 2.926426228 |
| C47 | 6.852897396  | 7.085738382  | 2.926672441 |
| C48 | 7.561998765  | 7.011144923  | 4.156418192 |
| C49 | 10.846606396 | 8.229211802  | 2.926291597 |
| C50 | 11.341795408 | 8.741544807  | 4.156045849 |
| C51 | 8.982847539  | 7.191813212  | 4.156347606 |
| C52 | 12.310105184 | 10.641404434 | 2.925622515 |
| C53 | 12.083370322 | 9.966335373  | 4.155772596 |
| C54 | 12.466243283 | 12.064540999 | 2.924769625 |
| C55 | 12.390719946 | 12.772323750 | 4.155286872 |
| C56 | 11.940072510 | 14.129080054 | 4.155134272 |
| C57 | 11.583655980 | 14.743010256 | 5.386038411 |
| C58 | 7.962983536  | 16.952078231 | 5.419874673 |
| C59 | 10.623143216 | 15.800976235 | 5.386938776 |
| C60 | 10.036673424 | 16.192479295 | 6.619591102 |
| C61 | 6.528135942  | 16.583399287 | 5.389226547 |
| C62 | 5.881681281  | 16.274537746 | 6.627558819 |
| C63 | 8.725322016  | 16.792068931 | 6.637014917 |
| C64 | 4.204224458  | 14.955816676 | 5.384958474 |
| C65 | 4.710799369  | 15.465043775 | 6.619688531 |
| C66 | 3.088128170  | 10.943150975 | 5.386596442 |
| C67 | 3.445261996  | 13.743984419 | 5.387193964 |
| C68 | 3.206376881  | 13.072458113 | 6.617241735 |
| C69 | 3.535432458  | 9.582871734  | 5.386374588 |
| C70 | 3.903046459  | 8.970906576  | 6.615964920 |
| C71 | 3.023823822  | 11.652671385 | 6.616666203 |
| C72 | 5.501731043  | 7.560191927  | 5.386151123 |
| C73 | 4.899706450  | 7.942806462  | 6.615894019 |
| C74 | 9.650979742  | 7.440893893  | 5.386145263 |
| C75 | 6.852758144  | 7.086033028  | 5.386130703 |
| C76 | 7.561870261  | 7.011220668  | 6.615842801 |
| C77 | 10.846753788 | 8.229769329  | 5.386128385 |
| C78 | 11.342309781 | 8.742212150  | 6.615712838 |

|      |              |              |             |
|------|--------------|--------------|-------------|
| C79  | 8.982670869  | 7.192345219  | 6.615811008 |
| C80  | 12.313513966 | 10.641094990 | 5.385622663 |
| C81  | 12.086852216 | 9.965866419  | 6.615625002 |
| C82  | 12.472482489 | 12.063901995 | 5.385420344 |
| C83  | 12.402389835 | 12.772728919 | 6.615471692 |
| C84  | 11.950244167 | 14.129980943 | 6.615927780 |
| C85  | 11.588645114 | 14.744214082 | 7.845549914 |
| C86  | 7.966437392  | 16.850252265 | 7.855754413 |
| C87  | 10.607888900 | 15.786947780 | 7.841801433 |
| C88  | 10.015015200 | 16.198599722 | 9.074199425 |
| C89  | 6.545153690  | 16.568393310 | 7.848503540 |
| C90  | 5.885495625  | 16.292767022 | 9.073363987 |
| C91  | 8.682134786  | 16.718808955 | 9.078144871 |
| C92  | 4.212275147  | 14.955316034 | 7.847943357 |
| C93  | 4.706416716  | 15.476474336 | 9.074525240 |
| C94  | 3.090809149  | 10.942954129 | 7.846395218 |
| C95  | 3.451182978  | 13.742996455 | 7.846968629 |
| C96  | 3.211462709  | 13.073452744 | 9.076607222 |
| C97  | 3.536442461  | 9.582143677  | 7.845982767 |
| C98  | 3.903581639  | 8.970750424  | 9.075629454 |
| C99  | 3.026914975  | 11.652566544 | 9.076161493 |
| C100 | 5.501515859  | 7.559724322  | 7.845588229 |
| C101 | 4.899925349  | 7.942194146  | 9.075498902 |
| C102 | 9.650632501  | 7.441400881  | 7.845458663 |
| C103 | 6.852740124  | 7.085725900  | 7.845530959 |
| C104 | 7.561680678  | 7.011074792  | 9.075283561 |
| C105 | 10.846560270 | 8.230571830  | 7.845357681 |
| C106 | 11.341767533 | 8.742424053  | 9.075194017 |
| C107 | 8.982564372  | 7.192370857  | 9.075152053 |
| C108 | 12.317005892 | 10.640700239 | 7.845502119 |
| C109 | 12.086239316 | 9.966099754  | 9.075264250 |
| C110 | 12.479517575 | 12.063994805 | 7.846019403 |
| C111 | 12.404398789 | 12.773285636 | 9.075432235 |
| C112 | 11.952794933 | 14.133489560 | 9.075354943 |
| Ir1  | -8.866907315 | -7.426060104 | 4.445226427 |
| Ir2  | -7.631219939 | -5.194815425 | 4.574685487 |
| Ir3  | -6.478056431 | -7.223463385 | 3.546533597 |
| Ir4  | -6.927782672 | -7.147729299 | 6.094074829 |
| N    | 7.885376750  | 22.653935477 | 5.421865101 |
| O    | 8.280929702  | 23.204454081 | 6.381051354 |

(8, 8)-Ir<sub>4</sub>-NO

|    |              |              |             |
|----|--------------|--------------|-------------|
| C1 | 12.187104474 | 16.209951262 | 0.806241738 |
| C2 | 11.074244528 | 17.117961882 | 0.805395659 |

|     |              |              |             |
|-----|--------------|--------------|-------------|
| C3  | 10.448500711 | 17.468740823 | 2.025517166 |
| C4  | 12.636510466 | 15.655782590 | 2.036563054 |
| C5  | 8.330704432  | 17.737183223 | 0.805625769 |
| C6  | 9.046816016  | 17.783983157 | 2.025210828 |
| C7  | 4.634605138  | 15.741654540 | 0.808019036 |
| C8  | 6.934130424  | 17.398854055 | 0.806826261 |
| C9  | 6.289958839  | 17.093129148 | 2.036847948 |
| C10 | 3.821190863  | 14.562961117 | 0.808709734 |
| C11 | 3.523277937  | 13.916561265 | 2.038007504 |
| C12 | 5.131458623  | 16.250628216 | 2.037688857 |
| C13 | 3.128749276  | 11.818176246 | 0.809244587 |
| C14 | 3.174353300  | 12.527576518 | 2.038796851 |
| C15 | 4.706481044  | 7.944190284  | 0.809818361 |
| C16 | 3.305174161  | 10.397604740 | 0.809629212 |
| C17 | 3.526521775  | 9.721205754  | 2.039382756 |
| C18 | 5.856017524  | 7.089988313  | 0.809898991 |
| C19 | 6.501724656  | 6.790661227  | 2.039633048 |
| C20 | 4.233071172  | 8.476133928  | 2.039573141 |
| C21 | 8.609479321  | 6.464073679  | 0.809859079 |
| C22 | 7.898622968  | 6.474223287  | 2.039612043 |
| C23 | 12.347720593 | 8.339359855  | 0.809400913 |
| C24 | 10.014716739 | 6.741078731  | 0.809711133 |
| C25 | 10.669267161 | 7.020423418  | 2.039438991 |
| C26 | 13.138329632 | 9.533186309  | 0.809022029 |
| C27 | 13.414688412 | 10.188675755 | 2.038531894 |
| C28 | 11.850152097 | 7.831274586  | 2.039160213 |
| C29 | 13.736580733 | 12.299079859 | 0.808337473 |
| C30 | 13.716378939 | 11.588288274 | 2.037695027 |
| C31 | 13.528592776 | 13.715091758 | 0.807536055 |
| C32 | 13.307968317 | 14.391674768 | 2.037169568 |
| C33 | 12.202940074 | 16.220591870 | 3.263533747 |
| C34 | 11.144001074 | 17.209195998 | 3.255543796 |
| C35 | 10.493369708 | 17.541359375 | 4.497899106 |
| C36 | 12.616454576 | 15.639150108 | 4.486943434 |
| C37 | 8.307596400  | 17.849531816 | 3.255811166 |
| C38 | 9.037195310  | 17.869272091 | 4.498371970 |
| C39 | 4.630872224  | 15.741332928 | 3.265740687 |
| C40 | 6.925383623  | 17.412814013 | 3.263710493 |
| C41 | 6.299521842  | 17.071523214 | 4.487750209 |
| C42 | 3.818376191  | 14.563185244 | 3.267518078 |
| C43 | 3.523934890  | 13.915966398 | 4.498002323 |
| C44 | 5.136083356  | 16.244128003 | 4.493981453 |
| C45 | 3.128584474  | 11.818301758 | 3.268579497 |
| C46 | 3.175079202  | 12.527717780 | 4.498430789 |

|     |              |              |             |
|-----|--------------|--------------|-------------|
| C47 | 4.706597421  | 7.944242904  | 3.269283899 |
| C48 | 3.305248844  | 10.397778477 | 3.269074024 |
| C49 | 3.526552610  | 9.721099572  | 4.498777759 |
| C50 | 5.856039811  | 7.090047437  | 3.269377752 |
| C51 | 6.501843682  | 6.790699661  | 4.499141596 |
| C52 | 4.233101330  | 8.476327507  | 4.499019959 |
| C53 | 8.609481691  | 6.464134881  | 3.269341464 |
| C54 | 7.898526513  | 6.474308192  | 4.499120243 |
| C55 | 12.347827538 | 8.339494987  | 3.268828569 |
| C56 | 10.014651453 | 6.741166330  | 3.269183684 |
| C57 | 10.669367440 | 7.020592026  | 4.498880539 |
| C58 | 13.138802405 | 9.533147695  | 3.268314032 |
| C59 | 13.414462186 | 10.188978849 | 4.498121336 |
| C60 | 11.850137934 | 7.831098534  | 4.498524727 |
| C61 | 13.740264368 | 12.298015075 | 3.267142380 |
| C62 | 13.715982237 | 11.587730485 | 4.497620951 |
| C63 | 13.533618135 | 13.713399212 | 3.265234725 |
| C64 | 13.299194933 | 14.387115677 | 4.493606384 |
| C65 | 12.149217685 | 16.175164555 | 5.727678688 |
| C66 | 11.092637271 | 17.104838455 | 5.730753779 |
| C67 | 10.499553732 | 17.568989699 | 6.957450692 |
| C68 | 12.612386017 | 15.639490748 | 6.962210860 |
| C69 | 8.306967821  | 17.735279168 | 5.730431092 |
| C70 | 9.039242145  | 17.900030564 | 6.957613767 |
| C71 | 4.637936691  | 15.738273066 | 5.727254165 |
| C72 | 6.949704493  | 17.357163217 | 5.727648673 |
| C73 | 6.302267249  | 17.072072477 | 6.962112990 |
| C74 | 3.823383241  | 14.561456917 | 5.727613699 |
| C75 | 3.525920275  | 13.915550586 | 6.957753187 |
| C76 | 5.135317070  | 16.244842956 | 6.959053435 |
| C77 | 3.129052534  | 11.818031256 | 5.728191987 |
| C78 | 3.175434654  | 12.527519470 | 6.958064344 |
| C79 | 4.706535054  | 7.944238858  | 5.728808628 |
| C80 | 3.305360135  | 10.397779108 | 5.728591933 |
| C81 | 3.526450005  | 9.721197378  | 6.958423778 |
| C82 | 5.856020409  | 7.090084097  | 5.728900797 |
| C83 | 6.501733964  | 6.790722888  | 6.958637952 |
| C84 | 4.233034125  | 8.476147345  | 6.958566897 |
| C85 | 8.609526519  | 6.464163091  | 5.728855713 |
| C86 | 7.898643583  | 6.474276207  | 6.958611560 |
| C87 | 12.347830617 | 8.339494622  | 5.728312444 |
| C88 | 10.014711338 | 6.741107652  | 5.728690595 |
| C89 | 10.669343664 | 7.020396455  | 6.958415103 |
| C90 | 13.138387091 | 9.532892428  | 5.727868606 |

|      |              |              |             |
|------|--------------|--------------|-------------|
| C91  | 13.413999789 | 10.188807251 | 6.957718894 |
| C92  | 11.850288967 | 7.831153194  | 6.958166239 |
| C93  | 13.734586375 | 12.298383510 | 5.727218014 |
| C94  | 13.713814324 | 11.588109844 | 6.957318188 |
| C95  | 13.524163298 | 13.712985603 | 5.726781265 |
| C96  | 13.299403971 | 14.386701161 | 6.958628036 |
| C97  | 12.172154220 | 16.206189377 | 8.187052776 |
| C98  | 11.094596112 | 17.148538491 | 8.193676008 |
| C99  | 10.443548994 | 17.445761367 | 9.415419600 |
| C100 | 12.622792739 | 15.649554669 | 9.418195822 |
| C101 | 8.323531808  | 17.773790001 | 8.194451123 |
| C102 | 9.039220595  | 17.761249242 | 9.415329643 |
| C103 | 4.634664373  | 15.740770308 | 8.188084532 |
| C104 | 6.943292677  | 17.391187697 | 8.188024169 |
| C105 | 6.297654281  | 17.083953873 | 9.418843572 |
| C106 | 3.821474241  | 14.562070636 | 8.187881829 |
| C107 | 3.524872696  | 13.916097594 | 9.417112311 |
| C108 | 5.133871248  | 16.249437836 | 9.417274677 |
| C109 | 3.128925636  | 11.818235442 | 8.187919088 |
| C110 | 3.174922311  | 12.527578918 | 9.417560694 |
| C111 | 4.706485786  | 7.944243333  | 8.188299742 |
| C112 | 3.305107470  | 10.397618703 | 8.188168606 |
| C113 | 3.526399304  | 9.721064508  | 9.417922330 |
| C114 | 5.856047203  | 7.090043176  | 8.188380888 |
| C115 | 6.501790756  | 6.790695628  | 9.418128090 |
| C116 | 4.232963306  | 8.476129401  | 9.418072826 |
| C117 | 8.609478804  | 6.464132781  | 8.188335820 |
| C118 | 7.898580177  | 6.474283125  | 9.418101406 |
| C119 | 12.347870805 | 8.339241068  | 8.187910241 |
| C120 | 10.014755512 | 6.741121341  | 8.188180271 |
| C121 | 10.669362826 | 7.020382818  | 9.417934235 |
| C122 | 13.138423588 | 9.533167209  | 8.187632633 |
| C123 | 13.414074046 | 10.188821446 | 9.417291555 |
| C124 | 11.850194766 | 7.831079094  | 9.417687379 |
| C125 | 13.736301215 | 12.297935107 | 8.187528327 |
| C126 | 13.714432745 | 11.588361562 | 9.416786601 |
| C127 | 13.528026654 | 13.713785075 | 8.187661852 |
| C128 | 13.303162865 | 14.390951890 | 9.416544924 |
| Ir1  | -4.321164724 | -4.163886068 | 5.057397182 |
| Ir2  | -3.546592567 | -6.502115410 | 4.307246530 |
| Ir3  | -6.014330621 | -5.957781328 | 4.306347507 |
| Ir4  | -4.775338434 | -6.193755639 | 6.536971822 |
| N    | 10.816763931 | 23.784455207 | 5.580302189 |
| O    | 10.824361329 | 24.534442478 | 6.491673802 |

(10, 10)-Ir<sub>4</sub>-NO

|     |              |              |             |
|-----|--------------|--------------|-------------|
| C1  | 12.053842236 | 15.446091200 | 0.218184662 |
| C2  | 10.941682521 | 16.338551700 | 0.215555830 |
| C3  | 10.341082554 | 16.719314350 | 1.442070142 |
| C4  | 12.532748224 | 14.927934698 | 1.447734725 |
| C5  | 8.281799218  | 17.313735631 | 0.207583582 |
| C6  | 8.999762253  | 17.245135933 | 1.429812909 |
| C7  | 4.192928173  | 16.313442231 | 0.210565009 |
| C8  | 6.857545793  | 17.282354266 | 0.211021893 |
| C9  | 6.153603352  | 17.147552893 | 1.442316570 |
| C10 | 3.045700203  | 15.457290390 | 0.211077587 |
| C11 | 2.544900066  | 14.953956140 | 1.441183399 |
| C12 | 4.814226900  | 16.652930462 | 1.441169647 |
| C13 | 1.360185724  | 13.175338457 | 0.212058770 |
| C14 | 1.695012319  | 13.802521015 | 1.441813034 |
| C15 | 0.810493446  | 8.991959961  | 0.213170643 |
| C16 | 0.885277555  | 11.826212131 | 0.212522114 |
| C17 | 0.754592323  | 11.126995077 | 1.442379912 |
| C18 | 1.222458457  | 7.621431447  | 0.213514998 |
| C19 | 1.532404979  | 6.981992703  | 1.443360406 |
| C20 | 0.716708930  | 9.697152162  | 1.442782716 |
| C21 | 2.847900683  | 5.299055292  | 0.214080187 |
| C22 | 2.352318723  | 5.808347797  | 1.443721875 |
| C23 | 6.678421065  | 3.530929912  | 0.215007550 |
| C24 | 3.994668184  | 4.443185754  | 0.214451611 |
| C25 | 4.623119697  | 4.110750390  | 1.444305293 |
| C26 | 8.108501076  | 3.522706925  | 0.215380451 |
| C27 | 8.811230995  | 3.633993666  | 1.445225838 |
| C28 | 5.977106044  | 3.650263100  | 1.444656826 |
| C29 | 10.802378911 | 4.405027735  | 0.215912897 |
| C30 | 10.170340967 | 4.079698854  | 1.445561143 |
| C31 | 13.619420169 | 7.547085082  | 0.216885585 |
| C32 | 11.958736443 | 5.248508543  | 0.216251143 |
| C33 | 12.459749754 | 5.752325689  | 1.446115727 |
| C34 | 14.064089032 | 8.906640550  | 0.217274779 |
| C35 | 14.177034175 | 9.608809028  | 1.447407267 |
| C36 | 13.296712330 | 6.913522024  | 1.446449745 |
| C37 | 14.078469900 | 11.741623496 | 0.218322523 |
| C38 | 14.182141592 | 11.038701821 | 1.448160783 |
| C39 | 13.652719872 | 13.107400818 | 0.219056293 |
| C40 | 13.337604927 | 13.745760800 | 1.448413077 |
| C41 | 12.053772183 | 15.464956566 | 2.674893306 |
| C42 | 10.975339107 | 16.393730445 | 2.661908097 |

|     |              |              |             |
|-----|--------------|--------------|-------------|
| C43 | 10.424536784 | 16.896739467 | 3.900795516 |
| C44 | 12.545087447 | 14.945631680 | 3.911015748 |
| C45 | 8.274035778  | 17.402650298 | 2.644992778 |
| C46 | 9.036411053  | 17.456521714 | 3.865534590 |
| C47 | 4.196053437  | 16.307330541 | 2.672635858 |
| C48 | 6.845489697  | 17.302768055 | 2.664770792 |
| C49 | 6.162014765  | 17.151829797 | 3.906160524 |
| C50 | 3.048161374  | 15.455012340 | 2.672112263 |
| C51 | 2.545827770  | 14.951580244 | 3.901371097 |
| C52 | 4.826233278  | 16.642165880 | 3.902137062 |
| C53 | 1.360044056  | 13.174907001 | 2.671659397 |
| C54 | 1.695182346  | 13.801736896 | 3.901558500 |
| C55 | 0.810397661  | 8.991906953  | 2.672619661 |
| C56 | 0.885113611  | 11.826114873 | 2.672040131 |
| C57 | 0.754140945  | 11.126789880 | 3.901881363 |
| C58 | 1.222409472  | 7.621460385  | 2.673000239 |
| C59 | 1.532324760  | 6.981949616  | 3.902846899 |
| C60 | 0.716475815  | 9.697095684  | 3.902258912 |
| C61 | 2.847896804  | 5.299049358  | 2.673583450 |
| C62 | 2.352295482  | 5.808373842  | 3.903211314 |
| C63 | 6.678441166  | 3.530935142  | 2.674505880 |
| C64 | 3.994661978  | 4.443197869  | 2.673955673 |
| C65 | 4.623128367  | 4.110756522  | 3.903799369 |
| C66 | 8.108513363  | 3.522693885  | 2.674875673 |
| C67 | 8.811240799  | 3.633977021  | 3.904732311 |
| C68 | 5.977111562  | 3.650282328  | 3.904149802 |
| C69 | 10.802412032 | 4.404924500  | 2.675415224 |
| C70 | 10.170346571 | 4.079662336  | 3.905085625 |
| C71 | 13.618959104 | 7.546876475  | 2.676397100 |
| C72 | 11.958742854 | 5.248334299  | 2.675763521 |
| C73 | 12.459678768 | 5.752240768  | 3.905687358 |
| C74 | 14.062628714 | 8.906386777  | 2.676810338 |
| C75 | 14.175974517 | 9.608988708  | 3.906587427 |
| C76 | 13.296478780 | 6.913457873  | 3.906091765 |
| C77 | 14.071711260 | 11.742326307 | 2.677938816 |
| C78 | 14.180412180 | 11.038761086 | 3.906821133 |
| C79 | 13.643997763 | 13.107376823 | 2.678806219 |
| C80 | 13.336519468 | 13.751187598 | 3.907969385 |
| C81 | 12.092141390 | 15.484545051 | 5.139490275 |
| C82 | 11.027000173 | 16.464756475 | 5.149361499 |
| C83 | 10.368924399 | 16.751336033 | 6.388186862 |
| C84 | 12.551246217 | 14.939746574 | 6.366420301 |
| C85 | 8.293893771  | 17.541881795 | 5.139496049 |
| C86 | 9.034957870  | 17.330468848 | 6.378281260 |



|      |              |              |             |
|------|--------------|--------------|-------------|
| C87  | 4.200773160  | 16.302294112 | 5.130599138 |
| C88  | 6.852684913  | 17.322424306 | 5.130398434 |
| C89  | 6.167131212  | 17.147339533 | 6.354370340 |
| C90  | 3.050361034  | 15.453079497 | 5.130922269 |
| C91  | 2.546961135  | 14.951605340 | 6.360929807 |
| C92  | 4.828699591  | 16.642302210 | 6.358730768 |
| C93  | 1.359930740  | 13.174664305 | 5.131387567 |
| C94  | 1.695319933  | 13.801637210 | 6.360986134 |
| C95  | 0.810213059  | 8.991857902  | 5.132123056 |
| C96  | 0.884764770  | 11.825818754 | 5.131594732 |
| C97  | 0.754214922  | 11.126745195 | 6.361438942 |
| C98  | 1.222338205  | 7.621412252  | 5.132492280 |
| C99  | 1.532341733  | 6.981985719  | 6.362362624 |
| C100 | 0.716420454  | 9.696977139  | 6.361812976 |
| C101 | 2.847893906  | 5.299074406  | 5.133074928 |
| C102 | 2.352310322  | 5.808372630  | 6.362720132 |
| C103 | 6.678437494  | 3.530947909  | 5.134006407 |
| C104 | 3.994670779  | 4.443221180  | 5.133447022 |
| C105 | 4.623125468  | 4.110772495  | 6.363298675 |
| C106 | 8.108512432  | 3.522703413  | 5.134383750 |
| C107 | 8.811219427  | 3.633988989  | 6.364250205 |
| C108 | 5.977105396  | 3.650276664  | 6.363652288 |
| C109 | 10.802380089 | 4.404930865  | 5.134965690 |
| C110 | 10.170317802 | 4.079705806  | 6.364615325 |
| C111 | 13.618945045 | 7.546979543  | 5.135903120 |
| C112 | 11.958696849 | 5.248395502  | 5.135360504 |
| C113 | 12.459650502 | 5.752448720  | 6.365210207 |
| C114 | 14.062953729 | 8.906664876  | 5.136253594 |
| C115 | 14.177684714 | 9.609136485  | 6.365727033 |
| C116 | 13.296566511 | 6.913709541  | 6.365586888 |
| C117 | 14.075076861 | 11.743237227 | 5.136254655 |
| C118 | 14.184321983 | 11.039373479 | 6.365676025 |
| C119 | 13.650371574 | 13.109651805 | 5.136042414 |
| C120 | 13.345290315 | 13.749404807 | 6.366395077 |
| C121 | 12.066977172 | 15.453139269 | 7.599863632 |
| C122 | 10.953599609 | 16.352230139 | 7.604096723 |
| C123 | 10.328510388 | 16.696781012 | 8.830029822 |
| C124 | 12.543333177 | 14.927707790 | 8.824665044 |
| C125 | 8.289530552  | 17.352653323 | 7.608399681 |
| C126 | 8.989659887  | 17.195015895 | 8.825629137 |
| C127 | 4.199708648  | 16.307091030 | 7.588423959 |
| C128 | 6.862170202  | 17.293084609 | 7.593581548 |
| C129 | 6.160543593  | 17.145390111 | 8.817541867 |
| C130 | 3.049851486  | 15.455025490 | 7.589465258 |

|      |              |               |             |
|------|--------------|---------------|-------------|
| C131 | 2.545106262  | 14.953703283  | 8.819550220 |
| C132 | 4.819714569  | 16.652470505  | 8.818701063 |
| C133 | 1.360143334  | 13.174679942  | 7.590756618 |
| C134 | 1.695179119  | 13.802466501  | 8.820107584 |
| C135 | 0.810340442  | 8.991873891   | 7.591696570 |
| C136 | 0.885048363  | 11.825943253  | 7.591114410 |
| C137 | 0.754446140  | 11.126882259  | 8.820986766 |
| C138 | 1.222395206  | 7.621426264   | 7.592034547 |
| C139 | 1.532377935  | 6.981961409   | 8.821872265 |
| C140 | 0.716655911  | 9.697120993   | 8.821339035 |
| C141 | 2.847902137  | 5.299064750   | 7.592578361 |
| C142 | 2.352320813  | 5.808356768   | 8.822220058 |
| C143 | 6.678422345  | 3.530927044   | 7.593508602 |
| C144 | 3.994665355  | 4.443204357   | 7.592951388 |
| C145 | 4.623114300  | 4.110741432   | 8.822798342 |
| C146 | 8.108492335  | 3.522696211   | 7.593887164 |
| C147 | 8.811211887  | 3.634004758   | 8.823735853 |
| C148 | 5.977098720  | 3.650259359   | 8.823152006 |
| C149 | 10.802363015 | 4.405049502   | 7.594454214 |
| C150 | 10.170302936 | 4.079758146   | 8.824088296 |
| C151 | 13.619274120 | 7.547339075   | 7.595313237 |
| C152 | 11.958664707 | 5.248547604   | 7.594832550 |
| C153 | 12.459715292 | 5.752575449   | 8.824637706 |
| C154 | 14.064132050 | 8.906834595   | 7.595566066 |
| C155 | 14.178800378 | 9.608913889   | 8.825603551 |
| C156 | 13.296757469 | 6.913812224   | 8.824971946 |
| C157 | 14.079490932 | 11.742301431  | 7.595726661 |
| C158 | 14.186191452 | 11.038944400  | 8.826146989 |
| C159 | 13.655221622 | 13.107693097  | 7.595678706 |
| C160 | 13.347783962 | 13.746341481  | 8.826347349 |
| Ir1  | -8.163160455 | -10.854543740 | 3.157073752 |
| Ir2  | -6.814056284 | -9.097878062  | 4.678463111 |
| Ir3  | -6.135792591 | -11.577456204 | 4.648130882 |
| Ir4  | -8.306108258 | -10.889399707 | 5.768432239 |
| N    | 11.556246337 | 22.258725915  | 5.871630986 |
| O    | 12.145230421 | 22.915775908  | 6.654394063 |
